# Supplementary material
Source: PubMed Central journal article supplement (PMC8581280)
Supplement: mmc1.pdf [file mmc1.pdf]

## Appendix A1 BLS-1 EtD Table Video-Based Dispatch vs. Audio-Based

### QUESTION

| Should video-based dispatch vs. audio-based dispatch be used for cardiac arrest? |                                                                                                                                                                                                                                                                                                                                                                                                                                                                |
|----------------------------------------------------------------------------------|----------------------------------------------------------------------------------------------------------------------------------------------------------------------------------------------------------------------------------------------------------------------------------------------------------------------------------------------------------------------------------------------------------------------------------------------------------------|
| POPULATION:                                                                      | Out-of-hospital cardiac arrest patient                                                                                                                                                                                                                                                                                                                                                                                                                         |
| INTERVENTION:                                                                    | video-based dispatch                                                                                                                                                                                                                                                                                                                                                                                                                                           |
| COMPARISON:                                                                      | audio-based dispatch                                                                                                                                                                                                                                                                                                                                                                                                                                           |
| MAIN OUTCOMES:                                                                   | good CPC at discharge - unadjusted; good CPC at discharge - propensity score matching; survival at discharge - unadjusted; survival at discharge - propensity score matching; prehospital_ROSC - unadjusted; prehospital_ROSC - propensity score matching;                                                                                                                                                                                                     |
| SETTING:                                                                         | out-of-hospital setting                                                                                                                                                                                                                                                                                                                                                                                                                                        |
| PERSPECTIVE:                                                                     | The target audience for this guideline are clinicians and the patients they treat, the perspective is therefore that of the individual patient rather than a health system perspective.                                                                                                                                                                                                                                                                        |
| BACKGROUND:                                                                      | DA-CPR is currently provided through a standard telephone audio-call between caller and dispatcher. As mobile technology evolves, video-calls have become generalized. Video-instructed DA-CPR has the advantage that the dispatcher can see the caller performing CPR and lead CPR by providing real-time feedback. Several simulation studies reported that the video-based dispatch improved CPR quality compared to traditional audio-call based dispatch. |
| CONFLICT OF INTERESTS:                                                           | None                                                                                                                                                                                                                                                                                                                                                                                                                                                           |

### ASSESSMENT

| Problem                                                                                                                                                                                                         |                                                                                                                                                                                                                                                                                                                                                                                                                                                                                                                                                                                                                                                                                                |                                                                                                                                                                                    |
|-----------------------------------------------------------------------------------------------------------------------------------------------------------------------------------------------------------------|------------------------------------------------------------------------------------------------------------------------------------------------------------------------------------------------------------------------------------------------------------------------------------------------------------------------------------------------------------------------------------------------------------------------------------------------------------------------------------------------------------------------------------------------------------------------------------------------------------------------------------------------------------------------------------------------|------------------------------------------------------------------------------------------------------------------------------------------------------------------------------------|
| Is the problem a priority?                                                                                                                                                                                      |                                                                                                                                                                                                                                                                                                                                                                                                                                                                                                                                                                                                                                                                                                |                                                                                                                                                                                    |
| JUDGEMENT                                                                                                                                                                                                       | RESEARCH EVIDENCE                                                                                                                                                                                                                                                                                                                                                                                                                                                                                                                                                                                                                                                                              | ADDITIONAL CONSIDERATIONS                                                                                                                                                          |
| <input type="radio"/> No<br><input type="radio"/> Probably no<br><input checked="" type="radio"/> Probably yes<br><input type="radio"/> Yes<br><input type="radio"/> Varies<br><input type="radio"/> Don't know | <p>Early bystander cardiopulmonary resuscitation (CPR) is a key factor in the chain of survival of OHCA. Dispatcher-assisted CPR (DA-CPR) programs have been recommended to increase the overall provision rate of bystander CPR. As mobile technology evolves and video-calls have become generalized, dispatchers may be able to provide CPR instruction while watching the scene.</p> <p>Video-based DA-CPR has been introduced to improve the quality of CPR provided by dispatcher instruction compared to traditional audio-based dispatch. Video-based DA-CPR has the advantage that the dispatcher can see the caller performing CPR and lead CPR by providing real-time feedback.</p> | <p>Video-based dispatch can also play a role in helping call takers to recognize cardiac arrest quickly by allowing them to see patient's status including agonal respiration.</p> |

**Desirable Effects**  
How substantial are the desirable anticipated effects?

| JUDGEMENT                                                                                                                                                 | RESEARCH EVIDENCE                                                                                                                                                                                                                                                                                                                                                                                                                                                                                                                                                                                                                                                                                                                                                                                                                                                                                                                                                                                                                                                                                               | ADDITIONAL CONSIDERATIONS                                                                                                                                                                                                                                                  |
|-----------------------------------------------------------------------------------------------------------------------------------------------------------|-----------------------------------------------------------------------------------------------------------------------------------------------------------------------------------------------------------------------------------------------------------------------------------------------------------------------------------------------------------------------------------------------------------------------------------------------------------------------------------------------------------------------------------------------------------------------------------------------------------------------------------------------------------------------------------------------------------------------------------------------------------------------------------------------------------------------------------------------------------------------------------------------------------------------------------------------------------------------------------------------------------------------------------------------------------------------------------------------------------------|----------------------------------------------------------------------------------------------------------------------------------------------------------------------------------------------------------------------------------------------------------------------------|
| <ul style="list-style-type: none"> <li>● Trivial</li> <li>○ Small</li> <li>○ Moderate</li> <li>○ Large</li> <li>○ Varies</li> <li>○ Don't know</li> </ul> | <p>A observational cohort study enrolled 1720 OHCA patients (1489 and 231 in the audio and video groups, respectively). The survival to discharge rates were 8.9% in the audio group and 14.3% in the video groups (p &lt; 0.01). Good neurological outcome occurred in 5.8% and 10.4% in the audio and video groups, respectively (p &lt; 0.01).</p> <p>However, the adjusted ORs (95% CIs) for survival to discharge and good neurological outcome of the video group were 1.20 (0.74-1.94) and 1.28 (0.73-2.26), respectively. The propensity score matched population (n=462) showed that the survival to discharge rate was same in the both group (both 14.3%). The rate of good neurological outcome was not significantly different between groups (11.3% in audio vs. 10.4% in video group, p = 0.76). The effect of video dispatch on patient outcomes has nt been assessed in a randomized controlled trial, but baised on the findings from the identified observational study - adjusted analysis suggests the effects might be trivial. Important uncertainty about desirable effects remain.</p> | <p>There were 13 manikin simulation studies to evaluate the CPR quality and the CPR initiation time between video vs audio-based dispatch.</p> <p>They showed improved CPR quality such as compression rate and time to compression in the video-based dispatch group.</p> |

**Undesirable Effects**  
How substantial are the undesirable anticipated effects?

| JUDGEMENT                                                                                                                                                 | RESEARCH EVIDENCE                                                                                                                                                                                   | ADDITIONAL CONSIDERATIONS |
|-----------------------------------------------------------------------------------------------------------------------------------------------------------|-----------------------------------------------------------------------------------------------------------------------------------------------------------------------------------------------------|---------------------------|
| <ul style="list-style-type: none"> <li>○ Large</li> <li>○ Moderate</li> <li>○ Small</li> <li>● Trivial</li> <li>○ Varies</li> <li>○ Don't know</li> </ul> | <p>There is no reported evidence about undesirable effect of using video-based dispatch system apart from simulation studies that suggest there might be a potential for delayed bystander CPR.</p> |                           |

**Certainty of evidence**  
What is the overall certainty of the evidence of effects?

| JUDGEMENT | RESEARCH EVIDENCE | ADDITIONAL CONSIDERATIONS |
|-----------|-------------------|---------------------------|
|           |                   |                           |

|                                                                                                                                                |                                                                                                                                                                                                                                                                                                 |  |
|------------------------------------------------------------------------------------------------------------------------------------------------|-------------------------------------------------------------------------------------------------------------------------------------------------------------------------------------------------------------------------------------------------------------------------------------------------|--|
| <ul style="list-style-type: none"> <li>● Very low</li> <li>○ Low</li> <li>○ Moderate</li> <li>○ High</li> <li>○ No included studies</li> </ul> | <p>There is only one clinical study. The risk of bias of the retrospective observational study assessed as serious, the certainty of evidence is graded as very low. The results differed according to statistical adjustment. We have to wait for the results of further clinical studies.</p> |  |
|------------------------------------------------------------------------------------------------------------------------------------------------|-------------------------------------------------------------------------------------------------------------------------------------------------------------------------------------------------------------------------------------------------------------------------------------------------|--|

**Values**  
Is there important uncertainty about or variability in how much people value the main outcomes?

| JUDGEMENT                                                                                                                                                                                                                                                        | RESEARCH EVIDENCE                                                                                                                                       | ADDITIONAL CONSIDERATIONS |
|------------------------------------------------------------------------------------------------------------------------------------------------------------------------------------------------------------------------------------------------------------------|---------------------------------------------------------------------------------------------------------------------------------------------------------|---------------------------|
| <ul style="list-style-type: none"> <li>○ Important uncertainty or variability</li> <li>○ Possibly important uncertainty or variability</li> <li>○ Probably no important uncertainty or variability</li> <li>● No important uncertainty or variability</li> </ul> | <p>There is little uncertainty around the value that people put on the main outcome of neurological survival and/or survival to hospital discharge.</p> |                           |

**Balance of effects**  
Does the balance between desirable and undesirable effects favor the intervention or the comparison?

| JUDGEMENT                                                                                                                                                                                                                                                                                                      | RESEARCH EVIDENCE                                                                                                                                                                                        | ADDITIONAL CONSIDERATIONS |
|----------------------------------------------------------------------------------------------------------------------------------------------------------------------------------------------------------------------------------------------------------------------------------------------------------------|----------------------------------------------------------------------------------------------------------------------------------------------------------------------------------------------------------|---------------------------|
| <ul style="list-style-type: none"> <li>○ Favors the comparison</li> <li>○ Probably favors the comparison</li> <li>○ Does not favor either the intervention or the comparison</li> <li>○ Probably favors the intervention</li> <li>○ Favors the intervention</li> <li>○ Varies</li> <li>● Don't know</li> </ul> | <p>The undesirable effect on video-based dispatch is not known, but the effect of video-based dispatch is also not significant. It is difficult to judge from only one reported observational study.</p> |                           |

**Resources required**  
How large are the resource requirements (costs)?

| JUDGEMENT | RESEARCH EVIDENCE | ADDITIONAL CONSIDERATIONS |
|-----------|-------------------|---------------------------|
|-----------|-------------------|---------------------------|

|                                                                                                                                                                                                                                |                                                                                                                                                                                                                                                                                                                                                                                                                                                                                                                                                                                            |  |
|--------------------------------------------------------------------------------------------------------------------------------------------------------------------------------------------------------------------------------|--------------------------------------------------------------------------------------------------------------------------------------------------------------------------------------------------------------------------------------------------------------------------------------------------------------------------------------------------------------------------------------------------------------------------------------------------------------------------------------------------------------------------------------------------------------------------------------------|--|
| <ul style="list-style-type: none"> <li>○ Large costs</li> <li>● Moderate costs</li> <li>○ Negligible costs and savings</li> <li>○ Moderate savings</li> <li>○ Large savings</li> <li>○ Varies</li> <li>○ Don't know</li> </ul> | <p>To implement video-based dispatch system, the dispatch center should set up appropriate video-related equipment, and relevant protocols should be developed and trained to the dispatchers.</p> <p>The availability of mobile video phones in local communities should be high.</p> <p>Cost and resources needed is expected to vary greatly between systems, and some dispatch systems might have already implemented video communication for other purposes. Still, the BLS task force assessed the likely costs associated with implementation of video dispatch to be moderate.</p> |  |
|--------------------------------------------------------------------------------------------------------------------------------------------------------------------------------------------------------------------------------|--------------------------------------------------------------------------------------------------------------------------------------------------------------------------------------------------------------------------------------------------------------------------------------------------------------------------------------------------------------------------------------------------------------------------------------------------------------------------------------------------------------------------------------------------------------------------------------------|--|

**Certainty of evidence of required resources**  
 What is the certainty of the evidence of resource requirements (costs)?

| JUDGEMENT                                                                                                                                      | RESEARCH EVIDENCE                                                                                                                                       | ADDITIONAL CONSIDERATIONS |
|------------------------------------------------------------------------------------------------------------------------------------------------|---------------------------------------------------------------------------------------------------------------------------------------------------------|---------------------------|
| <ul style="list-style-type: none"> <li>○ Very low</li> <li>○ Low</li> <li>○ Moderate</li> <li>○ High</li> <li>● No included studies</li> </ul> | <p>No research examined the resource requirements for the video-based dispatch. There is a high degree of uncertainty regarding required resources.</p> |                           |

**Cost effectiveness**  
 Does the cost-effectiveness of the intervention favor the intervention or the comparison?

| JUDGEMENT | RESEARCH EVIDENCE | ADDITIONAL CONSIDERATIONS |
|-----------|-------------------|---------------------------|
|-----------|-------------------|---------------------------|

|                                                                                                                                                                                                                                                                                                                                                                                                                                                                                |                                                                                                                                                                                                                  |  |
|--------------------------------------------------------------------------------------------------------------------------------------------------------------------------------------------------------------------------------------------------------------------------------------------------------------------------------------------------------------------------------------------------------------------------------------------------------------------------------|------------------------------------------------------------------------------------------------------------------------------------------------------------------------------------------------------------------|--|
| <ul style="list-style-type: none"> <li><input type="radio"/> Favors the comparison</li> <li><input type="radio"/> Probably favors the comparison</li> <li><input type="radio"/> Does not favor either the intervention or the comparison</li> <li><input type="radio"/> Probably favors the intervention</li> <li><input type="radio"/> Favors the intervention</li> <li><input type="radio"/> Varies</li> <li><input checked="" type="radio"/> No included studies</li> </ul> | <p>No research examined the cost-effectiveness for the video-based dispatch. There is a high degree of uncertainty regarding cost effectiveness as both effectiveness and cost of intervention is uncertain.</p> |  |
|--------------------------------------------------------------------------------------------------------------------------------------------------------------------------------------------------------------------------------------------------------------------------------------------------------------------------------------------------------------------------------------------------------------------------------------------------------------------------------|------------------------------------------------------------------------------------------------------------------------------------------------------------------------------------------------------------------|--|

**Equity**  
What would be the impact on health equity?

| JUDGEMENT                                                                                                                                                                                                                                                                                                                                                               | RESEARCH EVIDENCE                                                                                                                                                                                                                                                                                                                                                            | ADDITIONAL CONSIDERATIONS |
|-------------------------------------------------------------------------------------------------------------------------------------------------------------------------------------------------------------------------------------------------------------------------------------------------------------------------------------------------------------------------|------------------------------------------------------------------------------------------------------------------------------------------------------------------------------------------------------------------------------------------------------------------------------------------------------------------------------------------------------------------------------|---------------------------|
| <ul style="list-style-type: none"> <li><input type="radio"/> Reduced</li> <li><input checked="" type="radio"/> Probably reduced</li> <li><input type="radio"/> Probably no impact</li> <li><input type="radio"/> Probably increased</li> <li><input type="radio"/> Increased</li> <li><input type="radio"/> Varies</li> <li><input type="radio"/> Don't know</li> </ul> | <p>There is a possibility that video-based dispatch will not be available for the low socioeconomic cardiac arrest patients, who do not have a video-capable telephone at home, since there must be someone on site with a video phone. Dispatch systems with less resources is also likely to be disadvantaged as the cost of implementation is assumed to be moderate.</p> |                           |

**Acceptability**  
Is the intervention acceptable to key stakeholders?

| JUDGEMENT                                                                                                                                                                                                                                                                                       | RESEARCH EVIDENCE                                                                                                                               | ADDITIONAL CONSIDERATIONS |
|-------------------------------------------------------------------------------------------------------------------------------------------------------------------------------------------------------------------------------------------------------------------------------------------------|-------------------------------------------------------------------------------------------------------------------------------------------------|---------------------------|
| <ul style="list-style-type: none"> <li><input type="radio"/> No</li> <li><input type="radio"/> Probably no</li> <li><input type="radio"/> Probably yes</li> <li><input type="radio"/> Yes</li> <li><input type="radio"/> Varies</li> <li><input checked="" type="radio"/> Don't know</li> </ul> | <p>There is not yet sufficient evidence to judge whether the stakeholders accept the video-based dispatch compared to audio-based dispatch.</p> |                           |

**Feasibility**  
Is the intervention feasible to implement?

| JUDGEMENT                                                                                                                                                                                                                                                                                       | RESEARCH EVIDENCE                                                                                                                                                                                | ADDITIONAL CONSIDERATIONS |
|-------------------------------------------------------------------------------------------------------------------------------------------------------------------------------------------------------------------------------------------------------------------------------------------------|--------------------------------------------------------------------------------------------------------------------------------------------------------------------------------------------------|---------------------------|
| <ul style="list-style-type: none"> <li><input type="radio"/> No</li> <li><input type="radio"/> Probably no</li> <li><input type="radio"/> Probably yes</li> <li><input type="radio"/> Yes</li> <li><input checked="" type="radio"/> Varies</li> <li><input type="radio"/> Don't know</li> </ul> | <p>It is likely that the feasibility will be dependent on the setting that it is applied. The included observation study would suggest it is feasible for systems with sufficient resources.</p> |                           |

### SUMMARY OF JUDGEMENTS

|                                                    | JUDGEMENT                            |                                               |                                                          |                                                |                         |               |                            |
|----------------------------------------------------|--------------------------------------|-----------------------------------------------|----------------------------------------------------------|------------------------------------------------|-------------------------|---------------|----------------------------|
| <b>PROBLEM</b>                                     | No                                   | Probably no                                   | <b>Probably yes</b>                                      | Yes                                            |                         | Varies        | Don't know                 |
| <b>DESIRABLE EFFECTS</b>                           | <b>Trivial</b>                       | Small                                         | Moderate                                                 | Large                                          |                         | Varies        | Don't know                 |
| <b>UNDESIRABLE EFFECTS</b>                         | Large                                | Moderate                                      | Small                                                    | <b>Trivial</b>                                 |                         | Varies        | Don't know                 |
| <b>CERTAINTY OF EVIDENCE</b>                       | <b>Very low</b>                      | Low                                           | Moderate                                                 | High                                           |                         |               | No included studies        |
| <b>VALUES</b>                                      | Important uncertainty or variability | Possibly important uncertainty or variability | Probably no important uncertainty or variability         | <b>No important uncertainty or variability</b> |                         |               |                            |
| <b>BALANCE OF EFFECTS</b>                          | Favors the comparison                | Probably favors the comparison                | Does not favor either the intervention or the comparison | Probably favors the intervention               | Favors the intervention | Varies        | <b>Don't know</b>          |
| <b>RESOURCES REQUIRED</b>                          | Large costs                          | <b>Moderate costs</b>                         | Negligible costs and savings                             | Moderate savings                               | Large savings           | Varies        | Don't know                 |
| <b>CERTAINTY OF EVIDENCE OF REQUIRED RESOURCES</b> | Very low                             | Low                                           | Moderate                                                 | High                                           |                         |               | <b>No included studies</b> |
| <b>COST EFFECTIVENESS</b>                          | Favors the comparison                | Probably favors the comparison                | Does not favor either the intervention or the comparison | Probably favors the intervention               | Favors the intervention | Varies        | <b>No included studies</b> |
| <b>EQUITY</b>                                      | Reduced                              | <b>Probably reduced</b>                       | Probably no impact                                       | Probably increased                             | Increased               | Varies        | Don't know                 |
| <b>ACCEPTABILITY</b>                               | No                                   | Probably no                                   | Probably yes                                             | Yes                                            |                         | Varies        | <b>Don't know</b>          |
| <b>FEASIBILITY</b>                                 | No                                   | Probably no                                   | Probably yes                                             | Yes                                            |                         | <b>Varies</b> | Don't know                 |

### TYPE OF RECOMMENDATION

|                                                     |                                                          |                                                                               |                                                             |                                                 |
|-----------------------------------------------------|----------------------------------------------------------|-------------------------------------------------------------------------------|-------------------------------------------------------------|-------------------------------------------------|
| Strong recommendation against the intervention<br>○ | Conditional recommendation against the intervention<br>○ | Conditional recommendation for either the intervention or the comparison<br>○ | <b>Conditional recommendation for the intervention</b><br>● | Strong recommendation for the intervention<br>○ |
|-----------------------------------------------------|----------------------------------------------------------|-------------------------------------------------------------------------------|-------------------------------------------------------------|-------------------------------------------------|

## CONCLUSIONS

### Recommendation

We suggest that the usefulness of video-based dispatch system be assessed in clinical trials or research initiatives (weak recommendation, very-low-certainty evidence).

### Justification

Only a single human observational study was identified, so the evidence informing the guideline is very uncertain. As new communication technologies offer promising new avenues in emergency medical dispatch, the Basic Life Support Task Force felt it was important to encourage research in this important area and therefore provided conditional recommendation for video-based dispatch system to be assessed in clinical trials or research initiatives.

Several manikin simulation studies were identified evaluating video vs audio-based dispatch. Lin et al. published a systematic review comparing the effect of video-based and audio-based dispatch on quality of dispatcher-assisted CPR.<sup>15</sup> The review included 6 simulation studies that showed that video-based dispatcher-assisted CPR significantly improved the chest compression rate compared to the audio-based dispatch, and a trend for more correct hand position was also observed. However, video-based dispatch caused a delay in the commencement of bystander-initiated CPR.<sup>15</sup> While not directly informing clinical practice, these simulation studies provide important information about the aspects that need to be addressed and evaluated in future clinical studies evaluating video-dispatch.

### Subgroup considerations

To process video-based DA-CPR, more than two persons are needed, one to provide chest compressions and one to view the scene using a mobile phone. Therefore, it is expected that the feasibility and outcome of video-based dispatcher CPR may differ between crowded public place and cardiac arrest at home.

### Implementation considerations

In order to process video-based DA-CPR, the caller also needs to use a mobile phone capable of video telephony. Consideration should be given to whether the rate of penetration of video telephony is sufficient in the community.

### Monitoring and evaluation

If video-based dispatch system is implemented, the assessment for protocol and performance should be monitored.

## Research priorities

### Knowledge Gaps

- No RCT has compared video-based vs audio-based dispatch in any patient population.
- Further observation studies evaluating the use of video communication in emergency medical dispatch will provide important new insight.
- Two rescuers may be needed to effectively process video-based DA-CPR, one to provide chest compressions and one to handle the mobile phone and assist with communication. This might lead to varying feasibility of implementing video-based dispatcher CPR according to location of arrest (crowded public place vs. at home) etc.

Note to Webmaster: CoSTR posting should be linked to ETD summary table

### References

1. Lee SY, Song KJ, Shin SD, Hong KJ and Kim TH. Comparison of the effects of audio-instructed and video-instructed dispatcher-assisted cardiopulmonary resuscitation on resuscitation outcomes after out-of-hospital cardiac arrest. *Resuscitation*. 2020;147:12-20.
2. Atkinson PR, Bingham J, McNicholl BP, Loane MA and Wootton R. Telemedicine and cardiopulmonary resuscitation: the value of video-link and telephone instruction to a mock bystander. *Journal of Telemedicine & Telecare*. 1999;5:242-5.
3. Bang JY, Cho Y, Cho GC, Lee J and Kim IY. Can Mobile Videocall Assist Laypersons' Use of Automated External Defibrillators? A Randomized Simulation Study and Qualitative Analysis. *BioMed Research International*. 2020;2020:4069749.
4. Bolle SR, Scholl J and Gilbert M. Can video mobile phones improve CPR quality when used for dispatcher assistance during simulated cardiac arrest? *Acta Anaesthesiologica Scandinavica*. 2009;53:116-20.
5. Dong X, Zhang L, Myklebust H, Birkenes TS and Zheng ZJ. Effect of a real-time feedback smartphone application (TCPRLink) on the quality of telephone-assisted CPR performed by trained laypeople in China: a manikin-based randomised controlled study. *BMJ Open*. 2020;10:e038813.
6. Ecker H, Wingen S, Hamacher S, Lindacher F, Bottiger BW and Wetsch WA. Evaluation Of CPR Quality Via Smartphone With A Video Livestream - A Study In A Metropolitan Area. *Prehospital Emergency Care*. 2020:1-6.
7. Hunt EA, Heine M, Shilkofski NS, Bradshaw JH, Nelson-McMillan K, Duval-Arnould J and Elfenbein R. Exploration of the impact of a voice activated decision support system (VADSS) with video on resuscitation performance by lay rescuers during simulated cardiopulmonary arrest. *Emergency Medicine Journal*. 2015;32:189-94.
8. Lee JS, Jeon WC, Ahn JH, Cho YJ, Jung YS and Kim GW. The effect of a cellular-phone video demonstration to improve the quality of dispatcher-assisted chest compression-only cardiopulmonary resuscitation as compared with audio coaching. *Resuscitation*. 2011;82:64-8.
9. Marquez-Hernandez VV, Gutierrez-Puertas L, Garrido-Molina JM, Garcia-Viola A, Granados-Gamez G and Aguilera-Manrique G. Using a Mobile Phone Application Versus Telephone Assistance During Cardiopulmonary Resuscitation: A Randomized Comparative Study. *Journal of Emergency Nursing*. 2020;46:460-467.e2.
10. Perry O, Wacht O, Jaffe E, Sinuany-Stern Z and Bitan Y. Using a filming protocol to improve video-instructed cardiopulmonary resuscitation. *Technology & Health Care*. 2020;28:213-220.
11. Plata C, Stolz M, Warnecke T, Steinhauser S, Hinkelbein J, Wetsch WA, Bottiger BW and Spelten O. Using a smartphone application (PocketCPR) to determine CPR quality in a bystander CPR scenario - A manikin trial. *Resuscitation*. 2019;137:87-93.
12. Stipulante S, Delfosse AS, Donneau AF, Hartsein G, Haus S, D'Orio V and Ghuysen A. Interactive videoconferencing versus audio telephone calls for dispatcher-assisted cardiopulmonary resuscitation using the ALERT algorithm: a randomized trial. *European Journal of Emergency Medicine*. 2016;23:418-424.



13. Yang CW, Wang HC, Chiang WC, Chang WT, Yen ZS, Chen SY, Ko PC, Ma MH, Chen SC, Chang SC and Lin FY. Impact of adding video communication to dispatch instructions on the quality of rescue breathing in simulated cardiac arrests--a randomized controlled study. *Resuscitation*. 2008;78:327-32.
14. Yang CW, Wang HC, Chiang WC, Hsu CW, Chang WT, Yen ZS, Ko PC, Ma MH, Chen SC and Chang SC. Interactive video instruction improves the quality of dispatcher-assisted chest compression-only cardiopulmonary resuscitation in simulated cardiac arrests. *Critical Care Medicine*. 2009;37:490-5.
15. Lin YY, Chiang WC, Hsieh MJ, Sun JT, Chang YC and Ma MH. Quality of audio-assisted versus video-assisted dispatcher-instructed bystander cardiopulmonary resuscitation: A systematic review and meta-analysis. *Resuscitation*. 2018;123:77-85.

## Appendix A1 BLS-2 EtD Table Heads-Up CPR vs. Standard CPR

### QUESTION

| Should Head up CPR vs. standard CPR be used for cardiac arrest? |                                                                                                                                                                                                                                                                                                                                                   |
|-----------------------------------------------------------------|---------------------------------------------------------------------------------------------------------------------------------------------------------------------------------------------------------------------------------------------------------------------------------------------------------------------------------------------------|
| <b>POPULATION:</b>                                              | Adult patients in cardiac arrest                                                                                                                                                                                                                                                                                                                  |
| <b>INTERVENTION:</b>                                            | Head-up CPR                                                                                                                                                                                                                                                                                                                                       |
| <b>COMPARISON:</b>                                              | Standard CPR                                                                                                                                                                                                                                                                                                                                      |
| <b>MAIN OUTCOMES:</b>                                           | Admitted to hospital with spontaneous circulation;                                                                                                                                                                                                                                                                                                |
| <b>SETTING:</b>                                                 | In- and out-of-hospital settings                                                                                                                                                                                                                                                                                                                  |
| <b>PERSPECTIVE:</b>                                             | The target audience for this guideline are clinicians and the patients they treat, the perspective is therefore that of the individual patient rather than a health system perspective.                                                                                                                                                           |
| <b>BACKGROUND:</b>                                              | This topic was prioritized by the BLS Task Force based on increasing interest and debate surrounding head-up CPR within the resuscitation community. The BLS Task Force was aware of the growing body of animal research addressing head-up CPR, and aware that this strategy is currently being used in some Emergency Medical Services Systems. |
| <b>CONFLICT OF INTERESTS:</b>                                   | None                                                                                                                                                                                                                                                                                                                                              |

### ASSESSMENT

| Problem                                                                                                                                                                                                         |                                                                                                                          |                                  |
|-----------------------------------------------------------------------------------------------------------------------------------------------------------------------------------------------------------------|--------------------------------------------------------------------------------------------------------------------------|----------------------------------|
| Is the problem a priority?                                                                                                                                                                                      |                                                                                                                          |                                  |
| <b>JUDGEMENT</b>                                                                                                                                                                                                | <b>RESEARCH EVIDENCE</b>                                                                                                 | <b>ADDITIONAL CONSIDERATIONS</b> |
| <input type="radio"/> No<br><input type="radio"/> Probably no<br><input type="radio"/> Probably yes<br><input checked="" type="radio"/> Yes<br><input type="radio"/> Varies<br><input type="radio"/> Don't know | Mortality after cardiac arrest remains high, and there is broad consensus that new treatments and strategies are needed. |                                  |
| Desirable Effects                                                                                                                                                                                               |                                                                                                                          |                                  |
| How substantial are the desirable anticipated effects?                                                                                                                                                          |                                                                                                                          |                                  |
| <b>JUDGEMENT</b>                                                                                                                                                                                                | <b>RESEARCH EVIDENCE</b>                                                                                                 | <b>ADDITIONAL CONSIDERATIONS</b> |
|                                                                                                                                                                                                                 |                                                                                                                          |                                  |

|                                                                                                                                                                                                                                                                                              |                                                                                                                                                                                                                                                                                                                                                                                                                                                                                                                                                                                                                                                                                                                                                                                                                                                                                                                                        |  |
|----------------------------------------------------------------------------------------------------------------------------------------------------------------------------------------------------------------------------------------------------------------------------------------------|----------------------------------------------------------------------------------------------------------------------------------------------------------------------------------------------------------------------------------------------------------------------------------------------------------------------------------------------------------------------------------------------------------------------------------------------------------------------------------------------------------------------------------------------------------------------------------------------------------------------------------------------------------------------------------------------------------------------------------------------------------------------------------------------------------------------------------------------------------------------------------------------------------------------------------------|--|
| <ul style="list-style-type: none"> <li><input type="radio"/> Trivial</li> <li><input type="radio"/> Small</li> <li><input type="radio"/> Moderate</li> <li><input type="radio"/> Large</li> <li><input type="radio"/> Varies</li> <li><input checked="" type="radio"/> Don't know</li> </ul> | <p>The limited observational evidence identified in this review suggest head-up CPR might have the potential to improve short-term outcome from cardiac arrest (RR, 1.90; 95%CI, 1.61–2.26), but the certainty of evidence is very low with very high risk of bias. Head-up CPR was only assessed as a bundle with mechanical CPR with active decompression and the use of an impedance threshold device questioning the generalizability of the results to other systems. With a before-and-after design, the study is also at additional risk of being influenced by unrelated changes in practice with time which are not fully reported in particular, a change in ventilation strategy and potentially more efficient deployment of mechanical CPR that accompanied the intervention. Outcome measures were also limited to ROSC to hospital arrival, without any information on longer-term survival or functional outcomes.</p> |  |
|----------------------------------------------------------------------------------------------------------------------------------------------------------------------------------------------------------------------------------------------------------------------------------------------|----------------------------------------------------------------------------------------------------------------------------------------------------------------------------------------------------------------------------------------------------------------------------------------------------------------------------------------------------------------------------------------------------------------------------------------------------------------------------------------------------------------------------------------------------------------------------------------------------------------------------------------------------------------------------------------------------------------------------------------------------------------------------------------------------------------------------------------------------------------------------------------------------------------------------------------|--|

**Undesirable Effects**  
How substantial are the undesirable anticipated effects?

| JUDGEMENT                                                                                                                                                                                                                                                                                    | RESEARCH EVIDENCE                                                                                                                                                                                                                                                                                                                                                                                                                                                                                                                                                         | ADDITIONAL CONSIDERATIONS |
|----------------------------------------------------------------------------------------------------------------------------------------------------------------------------------------------------------------------------------------------------------------------------------------------|---------------------------------------------------------------------------------------------------------------------------------------------------------------------------------------------------------------------------------------------------------------------------------------------------------------------------------------------------------------------------------------------------------------------------------------------------------------------------------------------------------------------------------------------------------------------------|---------------------------|
| <ul style="list-style-type: none"> <li><input type="radio"/> Large</li> <li><input type="radio"/> Moderate</li> <li><input type="radio"/> Small</li> <li><input type="radio"/> Trivial</li> <li><input type="radio"/> Varies</li> <li><input checked="" type="radio"/> Don't know</li> </ul> | <p>As the single clinical study evaluating this treatment strategy was a retrospective before-and-after without any information about prospectively registered complications, the frequency and extent of undesirable effects are unknown. In experimental animal studies, the head-up strategy is only effective with mechanical CPR, an impedance threshold device and a when performed in a certain sequence of sequential elevation. There would therefore be reason to suspect it could have undesirable effects, or be ineffective, if not performed correctly.</p> |                           |

**Certainty of evidence**  
What is the overall certainty of the evidence of effects?

| JUDGEMENT                                                                                                                                                                                                                                                     | RESEARCH EVIDENCE                                                                                                                                                                                                                                                                                                                                                                                                                                                                                                                                                                                                                  | ADDITIONAL CONSIDERATIONS |
|---------------------------------------------------------------------------------------------------------------------------------------------------------------------------------------------------------------------------------------------------------------|------------------------------------------------------------------------------------------------------------------------------------------------------------------------------------------------------------------------------------------------------------------------------------------------------------------------------------------------------------------------------------------------------------------------------------------------------------------------------------------------------------------------------------------------------------------------------------------------------------------------------------|---------------------------|
| <ul style="list-style-type: none"> <li><input checked="" type="radio"/> Very low</li> <li><input type="radio"/> Low</li> <li><input type="radio"/> Moderate</li> <li><input type="radio"/> High</li> <li><input type="radio"/> No included studies</li> </ul> | <p>The effect of head up CPR is very uncertain, and only short term outcomes have been reported.</p> <p>Head-up CPR was only assessed as a bundle with mechanical CPR with active decompression and the use of an impedance threshold device questioning the generalizability of the results to other systems. With a before-and-after design, the study is also at additional risk of being influenced by unrelated changes in practice with time which are not fully reported in particular, a change in ventilation strategy and potentially more efficient deployment of mechanical CPR that accompanied the intervention.</p> |                           |

**Values**

| Is there important uncertainty about or variability in how much people value the main outcomes?                                                                                                                                                                                                                                                                                                                                                                       |                                                                                                                                                                                                                                                                                                                                                                                                                                                                                                                                                                                                                                                                                                     |                                                                                                                                                                                                                                                                                                                                                                                                                                                                                                                       |
|-----------------------------------------------------------------------------------------------------------------------------------------------------------------------------------------------------------------------------------------------------------------------------------------------------------------------------------------------------------------------------------------------------------------------------------------------------------------------|-----------------------------------------------------------------------------------------------------------------------------------------------------------------------------------------------------------------------------------------------------------------------------------------------------------------------------------------------------------------------------------------------------------------------------------------------------------------------------------------------------------------------------------------------------------------------------------------------------------------------------------------------------------------------------------------------------|-----------------------------------------------------------------------------------------------------------------------------------------------------------------------------------------------------------------------------------------------------------------------------------------------------------------------------------------------------------------------------------------------------------------------------------------------------------------------------------------------------------------------|
| JUDGEMENT                                                                                                                                                                                                                                                                                                                                                                                                                                                             | RESEARCH EVIDENCE                                                                                                                                                                                                                                                                                                                                                                                                                                                                                                                                                                                                                                                                                   | ADDITIONAL CONSIDERATIONS                                                                                                                                                                                                                                                                                                                                                                                                                                                                                             |
| <ul style="list-style-type: none"> <li><input type="radio"/> Important uncertainty or variability</li> <li><input checked="" type="radio"/> Possibly important uncertainty or variability</li> <li><input type="radio"/> Probably no important uncertainty or variability</li> <li><input type="radio"/> No important uncertainty or variability</li> </ul>                                                                                                           | <p>The only outcome evaluated in the identified evidence evaluating head-up CPR was return of spontaneous circulation (ROSC) at hospital admission. Long-term outcomes and functional outcomes were unknown. In keeping with the guidance provided by the COSCA initiative ("Core Outcome Set for Cardiac Arrest" - a partnership between patients, their partners, clinicians, research scientists, and the International Liaison Committee on Resuscitation, sought to develop a consensus core outcome set for cardiac arrest for effectiveness trials), there is uncertainty about how much people would value ROSC as an outcome in the absence of information about functional survival .</p> | <p>Haywood K, Whitehead L, Nadkarni VM, Achana F, Beesems S, Böttiger BW, Brooks A, Castrén M, Ong MEH, Hazinski MF, Kostler RW, Lilja G, Long J, Monsieurs KG, Morley PT, Morrison L, Nichol G, Oriolo V, Saposnik G, Smyth M, Spearpoint K, Williams B, Perkins GD; COSCA Collaborators. COSCA (Core Outcome Set for Cardiac Arrest) in Adults: An Advisory Statement From the International Liaison Committee on Resuscitation. Resuscitation. 2018 Jun;127:147-163. doi: 10.1016/j.resuscitation.2018.03.022.</p> |
| Balance of effects                                                                                                                                                                                                                                                                                                                                                                                                                                                    |                                                                                                                                                                                                                                                                                                                                                                                                                                                                                                                                                                                                                                                                                                     |                                                                                                                                                                                                                                                                                                                                                                                                                                                                                                                       |
| Does the balance between desirable and undesirable effects favor the intervention or the comparison?                                                                                                                                                                                                                                                                                                                                                                  |                                                                                                                                                                                                                                                                                                                                                                                                                                                                                                                                                                                                                                                                                                     |                                                                                                                                                                                                                                                                                                                                                                                                                                                                                                                       |
| JUDGEMENT                                                                                                                                                                                                                                                                                                                                                                                                                                                             | RESEARCH EVIDENCE                                                                                                                                                                                                                                                                                                                                                                                                                                                                                                                                                                                                                                                                                   | ADDITIONAL CONSIDERATIONS                                                                                                                                                                                                                                                                                                                                                                                                                                                                                             |
| <ul style="list-style-type: none"> <li><input type="radio"/> Favors the comparison</li> <li><input type="radio"/> Probably favors the comparison</li> <li><input type="radio"/> Does not favor either the intervention or the comparison</li> <li><input type="radio"/> Probably favors the intervention</li> <li><input type="radio"/> Favors the intervention</li> <li><input type="radio"/> Varies</li> <li><input checked="" type="radio"/> Don't know</li> </ul> | <p>As both desirable and undesirable effects are very uncertain, balancing them is not really possible.</p>                                                                                                                                                                                                                                                                                                                                                                                                                                                                                                                                                                                         |                                                                                                                                                                                                                                                                                                                                                                                                                                                                                                                       |
| Resources required                                                                                                                                                                                                                                                                                                                                                                                                                                                    |                                                                                                                                                                                                                                                                                                                                                                                                                                                                                                                                                                                                                                                                                                     |                                                                                                                                                                                                                                                                                                                                                                                                                                                                                                                       |
| How large are the resource requirements (costs)?                                                                                                                                                                                                                                                                                                                                                                                                                      |                                                                                                                                                                                                                                                                                                                                                                                                                                                                                                                                                                                                                                                                                                     |                                                                                                                                                                                                                                                                                                                                                                                                                                                                                                                       |
| JUDGEMENT                                                                                                                                                                                                                                                                                                                                                                                                                                                             | RESEARCH EVIDENCE                                                                                                                                                                                                                                                                                                                                                                                                                                                                                                                                                                                                                                                                                   | ADDITIONAL CONSIDERATIONS                                                                                                                                                                                                                                                                                                                                                                                                                                                                                             |
| <ul style="list-style-type: none"> <li><input type="radio"/> Large costs</li> <li><input type="radio"/> Moderate costs</li> <li><input type="radio"/> Negligible costs and savings</li> <li><input type="radio"/> Moderate savings</li> <li><input type="radio"/> Large savings</li> <li><input checked="" type="radio"/> Varies</li> <li><input type="radio"/> Don't know</li> </ul>                                                                                 | <p>Implementation of head-up CPR might require purchasing expensive equipment (mechanical CPR and the impedance threshold device), along with a substantial amount of education and training both in the use of this equipment and in the manner in which head-up CPR itself is deployed. The extent that Emergency Medical Services systems have already implemented mechanical CPR and the use of impedance threshold devices will impact on the cost related to implementation of the head-up CPR bundle, makes the cost far less in these systems. Our assessment is that there would be large variations in resource requirements depending on the system.</p>                                 |                                                                                                                                                                                                                                                                                                                                                                                                                                                                                                                       |

**Certainty of evidence of required resources**  
 What is the certainty of the evidence of resource requirements (costs)?

| JUDGEMENT                                                                                                                                                                                                                                                     | RESEARCH EVIDENCE                                                                                                                                                                                                                           | ADDITIONAL CONSIDERATIONS |
|---------------------------------------------------------------------------------------------------------------------------------------------------------------------------------------------------------------------------------------------------------------|---------------------------------------------------------------------------------------------------------------------------------------------------------------------------------------------------------------------------------------------|---------------------------|
| <ul style="list-style-type: none"> <li><input type="radio"/> Very low</li> <li><input type="radio"/> Low</li> <li><input type="radio"/> Moderate</li> <li><input type="radio"/> High</li> <li><input checked="" type="radio"/> No included studies</li> </ul> | The cost of mechanical CPR and impedance threshold devices are substantial when implemented in resuscitation systems, as is the cost of training and education. There are no important uncertainties regarding the required cost/resources. |                           |

**Cost effectiveness**  
 Does the cost-effectiveness of the intervention favor the intervention or the comparison?

| JUDGEMENT                                                                                                                                                                                                                                                                                                                                                                                                                                                                      | RESEARCH EVIDENCE                                                                                                                                                                                                                                                                                                                                                                              | ADDITIONAL CONSIDERATIONS |
|--------------------------------------------------------------------------------------------------------------------------------------------------------------------------------------------------------------------------------------------------------------------------------------------------------------------------------------------------------------------------------------------------------------------------------------------------------------------------------|------------------------------------------------------------------------------------------------------------------------------------------------------------------------------------------------------------------------------------------------------------------------------------------------------------------------------------------------------------------------------------------------|---------------------------|
| <ul style="list-style-type: none"> <li><input type="radio"/> Favors the comparison</li> <li><input type="radio"/> Probably favors the comparison</li> <li><input type="radio"/> Does not favor either the intervention or the comparison</li> <li><input type="radio"/> Probably favors the intervention</li> <li><input type="radio"/> Favors the intervention</li> <li><input type="radio"/> Varies</li> <li><input checked="" type="radio"/> No included studies</li> </ul> | The doubling in short term survival reported with the bundle including head-up CPR is promising, and if translated into improved long-term functional outcomes, and generalizable to other resuscitation systems, the intervention might be cost-effective. However, there is not enough evidence to determine the effectiveness of head-up CPR, and no evidence assessing cost-effectiveness. |                           |

**Equity**  
 What would be the impact on health equity?

| JUDGEMENT                                                                                                                                                                                                                                                                               | RESEARCH EVIDENCE                                                                                | ADDITIONAL CONSIDERATIONS |
|-----------------------------------------------------------------------------------------------------------------------------------------------------------------------------------------------------------------------------------------------------------------------------------------|--------------------------------------------------------------------------------------------------|---------------------------|
| <ul style="list-style-type: none"> <li><input type="radio"/> Reduced</li> <li><input checked="" type="radio"/> Probably reduced</li> <li><input type="radio"/> Probably no impact</li> <li><input type="radio"/> Probably increased</li> <li><input type="radio"/> Increased</li> </ul> | As the strategy requires expensive equipment, health equity would likely be negatively impacted. |                           |

|                                                                                                                                                                                                                 |                                                                                                                                                                                                                                                                                                                         |                                  |
|-----------------------------------------------------------------------------------------------------------------------------------------------------------------------------------------------------------------|-------------------------------------------------------------------------------------------------------------------------------------------------------------------------------------------------------------------------------------------------------------------------------------------------------------------------|----------------------------------|
| <input type="radio"/> Varies<br><input type="radio"/> Don't know                                                                                                                                                |                                                                                                                                                                                                                                                                                                                         |                                  |
| <b>Acceptability</b><br>Is the intervention acceptable to key stakeholders?                                                                                                                                     |                                                                                                                                                                                                                                                                                                                         |                                  |
| <b>JUDGEMENT</b>                                                                                                                                                                                                | <b>RESEARCH EVIDENCE</b>                                                                                                                                                                                                                                                                                                | <b>ADDITIONAL CONSIDERATIONS</b> |
| <input type="radio"/> No<br><input checked="" type="radio"/> Probably no<br><input type="radio"/> Probably yes<br><input type="radio"/> Yes<br><input type="radio"/> Varies<br><input type="radio"/> Don't know | Without a demonstrable improvement in longer-term outcomes, it is unlikely to be an acceptable strategy for key stakeholders. The Basic Life Support Task Force does not find the current evidence sufficient to recommend routine use of this strategy and encourages further research before its clinical deployment. |                                  |
| <b>Feasibility</b><br>Is the intervention feasible to implement?                                                                                                                                                |                                                                                                                                                                                                                                                                                                                         |                                  |
| <b>JUDGEMENT</b>                                                                                                                                                                                                | <b>RESEARCH EVIDENCE</b>                                                                                                                                                                                                                                                                                                | <b>ADDITIONAL CONSIDERATIONS</b> |
| <input type="radio"/> No<br><input type="radio"/> Probably no<br><input type="radio"/> Probably yes<br><input type="radio"/> Yes<br><input type="radio"/> Varies<br><input checked="" type="radio"/> Don't know | The use of the bundle including head-up CPR has been implemented at two different EMS systems, so is feasible to implement for similar systems with similar resources. The feasibility of broader implementation is not known.                                                                                          |                                  |

## SUMMARY OF JUDGEMENTS

|                       | JUDGEMENT                            |                                                      |                                                          |                                         |                         |        |                     |
|-----------------------|--------------------------------------|------------------------------------------------------|----------------------------------------------------------|-----------------------------------------|-------------------------|--------|---------------------|
| PROBLEM               | No                                   | Probably no                                          | Probably yes                                             | <b>Yes</b>                              |                         | Varies | Don't know          |
| DESIRABLE EFFECTS     | Trivial                              | Small                                                | Moderate                                                 | Large                                   |                         | Varies | <b>Don't know</b>   |
| UNDESIRABLE EFFECTS   | Large                                | Moderate                                             | Small                                                    | Trivial                                 |                         | Varies | <b>Don't know</b>   |
| CERTAINTY OF EVIDENCE | <b>Very low</b>                      | Low                                                  | Moderate                                                 | High                                    |                         |        | No included studies |
| VALUES                | Important uncertainty or variability | <b>Possibly important uncertainty or variability</b> | Probably no important uncertainty or variability         | No important uncertainty or variability |                         |        |                     |
| BALANCE OF EFFECTS    | Favors the comparison                | Probably favors the comparison                       | Does not favor either the intervention or the comparison | Probably favors the intervention        | Favors the intervention | Varies | <b>Don't know</b>   |

| JUDGEMENT                                   |                       |                                |                                                          |                                  |                         |        |                     |
|---------------------------------------------|-----------------------|--------------------------------|----------------------------------------------------------|----------------------------------|-------------------------|--------|---------------------|
| RESOURCES REQUIRED                          | Large costs           | Moderate costs                 | Negligible costs and savings                             | Moderate savings                 | Large savings           | Varies | Don't know          |
| CERTAINTY OF EVIDENCE OF REQUIRED RESOURCES | Very low              | Low                            | Moderate                                                 | High                             |                         |        | No included studies |
| COST EFFECTIVENESS                          | Favors the comparison | Probably favors the comparison | Does not favor either the intervention or the comparison | Probably favors the intervention | Favors the intervention | Varies | No included studies |
| EQUITY                                      | Reduced               | Probably reduced               | Probably no impact                                       | Probably increased               | Increased               | Varies | Don't know          |
| ACCEPTABILITY                               | No                    | Probably no                    | Probably yes                                             | Yes                              |                         | Varies | Don't know          |
| FEASIBILITY                                 | No                    | Probably no                    | Probably yes                                             | Yes                              |                         | Varies | Don't know          |

### TYPE OF RECOMMENDATION

|                                                                         |                                                                                                |                                                                                                   |                                                                          |                                                                     |
|-------------------------------------------------------------------------|------------------------------------------------------------------------------------------------|---------------------------------------------------------------------------------------------------|--------------------------------------------------------------------------|---------------------------------------------------------------------|
| Strong recommendation against the intervention<br><input type="radio"/> | <b>Conditional recommendation against the intervention</b><br><input checked="" type="radio"/> | Conditional recommendation for either the intervention or the comparison<br><input type="radio"/> | Conditional recommendation for the intervention<br><input type="radio"/> | Strong recommendation for the intervention<br><input type="radio"/> |
|-------------------------------------------------------------------------|------------------------------------------------------------------------------------------------|---------------------------------------------------------------------------------------------------|--------------------------------------------------------------------------|---------------------------------------------------------------------|

### CONCLUSIONS

#### Recommendation

We suggest against the routine use of head-up CPR during CPR (weak recommendation, very-low-certainty evidence).

We suggest that the usefulness of head-up CPR during CPR be assessed in clinical trials or research initiatives (weak recommendation, very-low-certainty evidence).

#### Justification

This topic was prioritized by the BLS Task Force based on increasing interest and debate surrounding head-up CPR within the resuscitation community. The BLS Task Force was aware of the growing body of animal research addressing head-up CPR,2-7 and aware that this strategy is currently being used in some Emergency Medical Services Systems.

The limited observational evidence identified in this review suggest head-up CPR might have the potential to improve short-term outcome from cardiac arrest, but the certainty of evidence is very low with very high risk of bias. Head-up CPR was only assessed as a bundle with mechanical CPR with active decompression and the use of an impedance threshold device questioning the generalizability of the results to other systems. With a

before-and-after design, the study is also at additional risk of being influenced by unrelated changes in practice with time which are not fully reported in particular, a change in ventilation strategy and potentially more efficient deployment of mechanical CPR that accompanied the intervention. Outcome measures were also limited to ROSC to hospital arrival, without any information on longer-term survival or functional outcomes.

Implementation of head-up CPR requires purchase of expensive equipment (mechanical CPR and the impedance threshold device), along with a substantial amount of education and training both in the use of this equipment and in the manner in which head-up CPR itself is deployed. Without a demonstrable improvement in longer-term outcomes, it is unlikely to be an acceptable strategy for key stakeholders. The Basic Life Support Task Force does not find the current evidence sufficient to recommend routine use of this strategy and encourages further research before its clinical deployment.

## Subgroup considerations

## Implementation considerations

## Monitoring and evaluation

## Research priorities

- No studies were identified that assessed head-up CPR alone versus standard care.
- We did not identify any RCTs that evaluated the effect of head-up CPR either alone or as part of a bundle of care.
- In the identified observational study, only short term/surrogate outcomes were evaluated, and future studies should document survival/neurologically intact survival to hospital discharge/30days.
