# Supplementary material
Source: PubMed Central journal article supplement (PMC8581280)
Supplement: mmc11.pdf [file mmc11.pdf]

## Appendix C1

### Supplement Post ROSC Angiography

Summary of observational data with high risk of bias and very low certainty of evidence.

#### POST ROSC no STEMI and all rhythms

For the critical outcome of **survival to hospital discharge** we identified very-low certainty evidence from 1 observational studies (Kim 2018) reporting adjusted odds ratios, which showed no benefit from the use of early coronary angiography when compared to late/no angiography [OR 1.60 (95% CI 0.73 to 3.53)].

For the critical outcome of **survival to hospital discharge** we identified very-low certainty evidence from 5 observational studies (Hanuschak 2019; Kern 2015; Kim 2018; Kleissner 2015; Vadeboncoer 2018) reporting unadjusted odds ratios. One study (Kleissner 2015) found no effect of early coronary angiography compared to late/no coronary angiography with OR 1.80 (95% CI 0.37 to 8.82). One study found a decrease in survival (Kim 2018) [OR 0.41 (95% CI 0.23 to 0.72)] and 3 studies found increased survival with early coronary angiography (Hanuschak 2019; Kern 2015; Vadeboncoer 2018). The effect sizes ranged from a low of OR 2.80 (95% CI 1.94 to 4.04) to a high of OR 7.42 (95% CI 5.44 to 10.12).

For the critical outcome of **survival at 30 days**, we identified very-low certainty from one study (Bro-Jeppesen 2012) which found no effect of early coronary angiography compared to late/no angiography [OR<sub>adj</sub> 1.42 (95% CI 1.00 to 2.50) and OR<sub>unadj</sub> 1.66 (95% CI 0.96 to 2.88)].

For the critical outcome of **survival at 3-6 months**, we identified very-low-certainty evidence from 1 observational studies (Kleissner 2015) with unadjusted effect estimates of OR 1.48 (95% CI 0.55 to 3.99).

For the critical outcome of **survival at 1-3 years**, we identified very-low-certainty evidence from 1 observational study (Bro-Jeppesen 2012) which found no effect of early coronary angiography compared to late/no angiography with an adjusted OR 0.97 (95% CI 0.76 to 1.25).

We identified very-low-certainty evidence from 2 observational studies (Bro-Jeppesen 2012; Dankiewicz 2015). One study (Bro-Jeppesen 2012) found increased survival with early coronary angiography [OR 1.92 (95% CI 1.11 to 3.32)] and one study (Dankiewicz 2015) found no effect [OR 1.27 (95% CI 0.91 to 1.79)].

For the critical outcome of survival with **favourable neurologic outcome at hospital discharge**, we identified very-low-certainty evidence from 1 observational study (Bro-Jeppesen 2012) with adjusted effect estimates which found no effect of early coronary angiography compared to late/no angiography [OR 1.50 (95% CI 0.80 to 2.90)].

We identified very-low-certainty evidence from 3 observational studies (Bro-Jeppesen 2012; Hanuschak 2019; Kleissner 2015) with unadjusted effect estimates. One study (Kleissner 2015) found on effect with early coronary angiography [OR 1.28 (95% CI 0.51 to 3.20)]. Two studies (Bro-Jeppesen 2012; Hanuschuk 2019) found increased survival with favourable neurologic outcome with early coronary angiography with a range of effect estimates from a low of OR 1.94 (95% CI 1.19 to 3.17) to a high of OR 8.37 (95% CI 6.18 to 11.35).

For the critical outcome of survival with *favourable neurologic outcome at 30 days*, we identified very-low-certainty evidence from 1 study (Kim 2018) with adjusted effect size which found no effect with early coronary angiography with an OR 1.92 (95% CI 0.95 to 3.85)

We identified very-low-certainty evidence from 2 observational studies (Kim 2018; Kern 2015) with unadjusted effect estimates. One study (Kern 2015) found an increase in survival with favourable neurologic outcome at 30 days with early coronary angiography [OR 2.77 (95% CI 1.92 to 4.00)] and one study (Kim 2018) found a decrease with early coronary angiography [OR 0.45 (95% CI 0.26 to 0.77)].

For the critical outcome of survival with *favourable neurologic outcome at 3-6 months*, we identified very-low-certainty evidence from one observational study (Dankiewicz 2015) with adjusted effect estimate which found no effect of early coronary angiography OR 0.92 (95% CI 0.69 to 1.18).

We identified very-low certainty evidence from 2 studies (Dankiewicz 2015; Kleissner 2015) with unadjusted effect estimates. Both studies (Dankiewicz 2015; Kleissner 2015) found no benefit with early coronary angiography [OR 1.36 (95% CI 0.97 to 1.91) and OR 2.01 (95% CI 0.77 to 5.24) respectively].

Table 1: Studies examining post-ROSC coronary angiography in patients with no ST elevation on ECG and all ECG rhythms

| Survival                      |                      |                      |                    |                      |                       |                      |                      |                      |
|-------------------------------|----------------------|----------------------|--------------------|----------------------|-----------------------|----------------------|----------------------|----------------------|
|                               | Adjusted             |                      |                    |                      | Unadjusted            |                      |                      |                      |
| Author                        | Hospital Discharge   | 30-Day Survival      | 3-6 Month Survival | 1-3 Year Survival    | Hospital Discharge    | 30-Day Survival      | 3-6 Month Survival   | 1-3 Year Survival    |
| Bro-Jeppesen 2012             |                      | 1.42<br>(1.00, 2.50) |                    |                      |                       | 1.66<br>(0.96, 2.88) |                      | 1.92<br>(1.11, 3.32) |
| Dankiewicz 2015               |                      |                      |                    | 0.97<br>(0.76, 1.25) |                       |                      |                      | 1.27<br>(0.91, 1.79) |
| Hanuschak 2019                |                      |                      |                    |                      | 7.42<br>(5.44, 10.12) |                      |                      |                      |
| Kern 2015                     |                      |                      |                    |                      | 2.80<br>(1.94, 4.04)  |                      |                      |                      |
| Kim 2018                      | 1.60<br>(0.73, 3.53) |                      |                    |                      | 0.41<br>(0.23, 0.72)  |                      |                      |                      |
| Kleissner 2015                |                      |                      |                    |                      | 1.80<br>(0.37, 8.82)  |                      | 1.48<br>(0.55, 3.99) |                      |
| Vadeboncoer 2018              |                      |                      |                    |                      | 3.26<br>(2.51, 4.23)  |                      |                      |                      |
| Favourable Neurologic Outcome |                      |                      |                    |                      |                       |                      |                      |                      |
|                               | Adjusted             |                      |                    |                      | Unadjusted            |                      |                      |                      |
| Author                        | Hospital Discharge   | 30-Day Survival      | 3-6 Month Survival | 1-3 Year Survival    | Hospital Discharge    | 30-Day Survival      | 3-6 Month Survival   | 1-3 Year Survival    |

|                      |                      |                      |                      |  |                       |                      |                      |  |
|----------------------|----------------------|----------------------|----------------------|--|-----------------------|----------------------|----------------------|--|
| Bro-Jeppesen<br>2012 | 1.50<br>(0.80, 2.90) |                      |                      |  | 1.98<br>(1.14, 3.43)  |                      |                      |  |
| Dankiewicz<br>2015   |                      |                      | 0.92<br>(0.69, 1.18) |  |                       |                      | 1.36<br>(0.97, 1.91) |  |
| Hanuschak<br>2019    |                      |                      |                      |  | 8.37<br>(6.18, 11.35) |                      |                      |  |
| Kern 2015            |                      |                      |                      |  |                       | 2.77<br>(1.92, 4.00) |                      |  |
| Kim 2018             |                      | 1.92<br>(0.95, 3.85) |                      |  |                       | 0.45<br>(0.26, 0.77) |                      |  |
| Kleissner 2015       |                      |                      |                      |  | 1.28<br>(0.51, 3.20)  |                      | 2.01<br>(0.77, 5.25) |  |

### POST ROSC no STEMI and shockable initial rhythm

For the critical outcome of *survival to hospital discharge* we identified very-low certainty evidence from two observational studies (Garcia 2016; Hollenbeck 2014) which reported adjusted effect estimates for early coronary angiography compared to late/no angiography. One studies (Hollenbeck 2014) identified benefit from early angiography [OR 2.86 (95% CI 1.43 to 5.56)]. A single study (Garcia 2016) found no effect of early angiography [OR 1.73 (95% CI 0.80 to 3.74)].

We also identified very-low certainty evidence from two studies (Garcia 2016; Hollenbeck 2014) reporting unadjusted effect estimates for early coronary angiography compared to late/no angiography. One study (Hollenbeck 2014) identified benefit with early angiography with an OR 2.04 (95% CI 1.24 to 3.34). Garcia (2016) found no benefit with early coronary angiography [OR 1.25 (95% CI 0.67 to 2.34)].

For the critical outcome of *survival at 30 days* we identified very-low certainty evidence from one study (Elfwen 2018) which reported an adjusted effect estimate of OR 1.42 (95% CI 1.00 to 2.02).

We also identified very-low certainty evidence from one study (Elfwen 2018) reporting unadjusted effect estimates with an OR 1.73 (95% CI 1.28 to 2.34).

For the critical outcome of *survival at 1-3 years* we identified very-low certainty evidence from a single study (Elfwen 2018) which reported adjusted effect estimates and found benefit with early angiography with an OR 1.35 (95% CI 1.04 to 1.77).

We identified very-low certainty evidence from 2 studies (Elfwen 2018; Hollenbeck 2014) which reported unadjusted effect estimates. Both studies found benefit with early angiography with effect estimates ranging from a low of OR 1.77 (95% CI 1.32 to 2.39) to a high of OR 3.48 (95% CI 2.36 to 5.14).

For the critical outcome of *favourable neurologic outcome at hospital discharge* we identified very-low certainty evidence from one observational studies (Garcia 2016) identifying benefit with the use of early angiography compared to late/no angiography with an adjusted OR 2.77 (95% CI 1.31 to 5.85).

We also identified very-low certainty evidence from two observational studies (Garcia 2016; Hollenbeck 2014) which reported unadjusted effect estimates for early coronary angiography compared to late/no angiography. One study (Hollenbeck 2014) found benefit with early coronary angiography [OR 1.94 (95 %CI 1.19 to 3.17)]. The other study (Garcia 2016) found no benefit with early coronary angiography [OR 1.70 (95% CI 0.95 to 3.06)].

For the critical outcome of survival with *favourable neurologic outcome at 1-3 years* we identified very-low certainty evidence from 1 study (Hollenbeck 2014) reporting unadjusted effect estimates with an OR 2.11 (95% CI 1.30 to 3.45).

Table 2: Studies examining post-ROSC coronary angiography in patients with no ST elevation on ECG and initial shockable rhythms

| Survival                      |                      |                      |                    |                      |                      |                      |                    |                      |
|-------------------------------|----------------------|----------------------|--------------------|----------------------|----------------------|----------------------|--------------------|----------------------|
|                               | Adjusted             |                      |                    |                      | Unadjusted           |                      |                    |                      |
| Author                        | Hospital Discharge   | 30-Day Survival      | 3-6 Month Survival | 1-3 Year Survival    | Hospital Discharge   | 30-Day Survival      | 3-6 Month Survival | 1-3 Year Survival    |
| Garcia 2016                   | 1.73<br>(0.80, 3.74) |                      |                    |                      | 1.25<br>(0.67, 2.34) |                      |                    |                      |
| Elfwen 2018                   |                      | 1.42<br>(1.00, 2.02) |                    | 1.35<br>(1.04, 1.77) |                      | 1.73<br>(1.28, 2.34) |                    | 1.77<br>(1.32, 2.39) |
| Hollenbeck 2014               | 2.86<br>(1.43, 5.56) |                      |                    |                      | 2.04<br>(1.24, 3.34) |                      |                    | 2.06<br>(1.26, 3.35) |
| Favourable Neurologic Outcome |                      |                      |                    |                      |                      |                      |                    |                      |
|                               | Adjusted             |                      |                    |                      | Unadjusted           |                      |                    |                      |
| Author                        | Hospital Discharge   | 30-Day Survival      | 3-6 Month Survival | 1-3 Year Survival    | Hospital Discharge   | 30-Day Survival      | 3-6 Month Survival | 1-3 Year Survival    |
| Garcia 2016                   | 2.77<br>(1.31, 5.85) |                      |                    |                      | 1.70<br>(0.95, 3.06) |                      |                    |                      |
| Hollenbeck 2014               |                      |                      |                    |                      | 1.94<br>(1.19, 3.17) |                      |                    | 2.11<br>(1.30, 3.45) |

POST ROSC With ST-segment elevation on ECG

For the critical outcome of *survival at hospital discharge* we identified very-low certainty evidence from one study (Garcia 2016) which reported adjusted effect estimates for early coronary angiography compared to late/no coronary angiography for patients with ROSC after out-of-hospital cardiac arrest. The study found no effect with early angiography [OR 1.89 (95% CI 0.48 to 7.40)].

We also identified very-low certainty evidence from 4 studies (Garcia 2016; Hanuschack 2019; Kern 2015; Pleskot 2008) which reported unadjusted effect estimates for early coronary angiography compared to late/no angiography. Two studies (Hanuschak 2019; Pleskot 2008) identified benefit from early

angiography with OR 4.07 (95% CI 2.85 to 5.82) and OR 11.67 (95% CI 1.11 to 122.38) respectively. Two other studies (Garcia 2016; Kern 2015) found no benefit with early angiography with OR 1.65 (95% CI 0.45 to 6.09) and OR 0.85 (95% CI 0.31 to 2.32).

For the critical outcome of *survival at 1-3 years* we identified very-low certainty evidence from one study (Pleskot 2008) which reported unadjusted effect estimates with an OR 11.67 (95% CI 1.11 to 122.38).

For the critical outcome of survival with *favourable neurologic outcome at hospital discharge*, we identified very-low-certainty evidence from 2 observational study (Garcia 2016; Weiser 2013) with adjusted effect estimates which found no difference in favourable neurologic outcome with early coronary angiography with an OR 1.12 (95% CI 0.30 to 4.19) and OR 1.17 (95% CI 0.45 to 3.04) respectively.

We also identified very-low certainty evidence from 4 studies (Garcia 2016; Hanuschack 2019; Pleskot 2008; Weiser 2013) which reported unadjusted effect estimates for early coronary angiography compared to late/no angiography. Two studies (Hanuschak 2019; Weiser 2013) identified benefit from early angiography with OR 4.05 (95% CI 2.82 to 5.83) and OR 1.94 (95% CI 1.05 to 3.59) respectively. Two other studies (Garcia 2016; Pleskot 2008) found no benefit with early angiography with OR 1.03 (95% CI 0.28 to 3.76) and OR 7.50 (95% CI 0.73 to 76.77).

For the critical outcome of *survival at 1-3 years* we identified very-low certainty evidence from one study (Pleskot 2008) which reported unadjusted effect estimates with an OR 11.67 (95% CI 1.11 to 122.38).

**Table 3: Studies examining post-ROSC coronary angiography in patients with ST elevation on ECG**

| Survival                      |                      |                 |                    |                   |                         |                 |                    |                         |
|-------------------------------|----------------------|-----------------|--------------------|-------------------|-------------------------|-----------------|--------------------|-------------------------|
|                               | Adjusted             |                 |                    |                   | Unadjusted              |                 |                    |                         |
| Author                        | Hospital Discharge   | 30-Day Survival | 3-6 Month Survival | 1-3 Year Survival | Hospital Discharge      | 30-Day Survival | 3-6 Month Survival | 1-3 Year Survival       |
| Garcia 2016                   | 1.89<br>(0.48, 7.40) |                 |                    |                   | 1.65<br>(0.45, 6.09)    |                 |                    |                         |
| Hanuschak 2019                |                      |                 |                    |                   | 4.07<br>(2.85, 5.82)    |                 |                    |                         |
| Kern 2015                     |                      |                 |                    |                   | 0.85<br>(0.31, 2.32)    |                 |                    |                         |
| Pleskot 2008                  |                      |                 |                    |                   | 11.67<br>(1.11, 122.38) |                 |                    | 11.67<br>(1.11, 122.38) |
| Favourable Neurologic Outcome |                      |                 |                    |                   |                         |                 |                    |                         |
|                               | Adjusted             |                 |                    |                   | Unadjusted              |                 |                    |                         |
| Author                        | Hospital Discharge   | 30-Day Survival | 3-6 Month Survival | 1-3 Year Survival | Hospital Discharge      | 30-Day Survival | 3-6 Month Survival | 1-3 Year Survival       |
| Garcia 2016                   | 1.12<br>(0.30, 4.19) |                 |                    |                   | 1.03<br>(0.28, 3.76)    |                 |                    |                         |

|                |                      |  |  |  |                       |  |  |                         |
|----------------|----------------------|--|--|--|-----------------------|--|--|-------------------------|
| Hanuschak 2019 |                      |  |  |  | 4.05<br>(2.82, 5.83)  |  |  |                         |
| Pleskot 2008   |                      |  |  |  | 7.50<br>(0.73, 76.77) |  |  | 11.67<br>(1.11, 122.38) |
| Weiser 2013    | 1.17<br>(0.45, 3.04) |  |  |  | 1.94<br>(1.05, 3.59)  |  |  |                         |

### POST ROSC all ECGs (undifferentiated) all initial rhythms

For the critical outcome of *survival to hospital discharge* we identified very-low certainty evidence from four studies (Bougouin 2018; Shin 2017; Stub 2011; Zanuttini 2012) which reported adjusted effect estimates for early coronary angiography compared to late/no coronary angiography. Two studies (Shin 2017; Zanuttini 2012) identified benefit with early angiography with effect estimates of OR 2.70 (95% CI 1.60 to 4.60) and OR 2.32 (95% CI 1.23 to 4.38). Two studies (Bougouin 2018; Stub 2011) found no benefit with early angiography [OR 1.20 (95% CI 0.80 to 1.90) to OR 4.30 (95% CI 0.97 to 19.00)].

We also identified very-low certainty evidence from 21 studies (Study Citations) which reported unadjusted effect estimates for early angiography compared to late/no angiography in patients with ROSC after out-of-hospital cardiac arrest. Seventeen studies (Study Citations) identified benefit of early coronary angiography with unadjusted effect estimates ranging from a low of OR 1.73 (95% CI 1.34 to 2.23) to a high of OR 7.60 (95% CI 3.20 to 17.50). Four studies (Study Citations) found no benefit with the use of early angiography with effect estimates ranging from a low of OR 1.20 (95% CI 0.50 to 2.90) to a high of OR 2.46 (95% CI 1.00 to 6.04).

For the critical outcome of *survival at 30-days* we identified very-low certainty evidence from three studies (Casella 2014; Jaeger 2018; Waldo 2013) reporting adjusted effect estimates for the use of early coronary angiography compared to late/no angiography in patients with ROSC after out-of-hospital cardiac arrest. All three studies (Casella 2015; Jaeger 2018; Waldo 2013) identified benefit with the use of early angiography with adjusted effect estimates ranging from a low of OR 1.52 (95% CI 1.33 to 1.72) to a high of OR 2.38 (1.06, 5.26).

We identified very-low certainty evidence from four observational studies (Bro-Jeppesen 2012; Casella 2015; Jaeger 2018; Winther-Jensen 2018) reporting unadjusted effect estimates for early coronary angiography compared to late/no angiography for patients with ROSC after out-of-hospital cardiac arrest. All four studies (Bro-Jeppesen 2012; Casella 2015; Jaeger 2018; Winther-Jensen 2018) identified benefit with early angiography with effect estimates ranging from a low of OR 1.61 (95% CI 1.05 to 2.47) to a high of OR 2.59 (95% CI 1.24 to 5.43).

For the critical outcome of *survival at 1-3 years* we identified very-low certainty evidence from one observational studies (Casella 2015) reporting adjusted effect estimates for early coronary angiography compared to late/no angiography which showed benefit with early coronary angiography with an OR 3.57 (95% CI 1.32 to 10.00).

We also identified very-low certainty evidence from four studies (Bergman 2016; Bro-Jeppesen 2012; Casella 2015; Geri 2015) which reported unadjusted effect estimates for early coronary angiography compared to late/no angiography. All four studies (Bergman 2016; Bro-Jeppesen 2012; Casella 2015; Geri 2015) identified benefit with early angiography with effect estimates ranging from a low of OR 1.84 (95% CI 1.20 to 2.81) to a high of OR 4.51 (95% CI 2.07 to 9.87).

For the critical outcome of survival with *favourable neurologic outcome at hospital discharge*, we identified very-low-certainty evidence from five observational study (Bougouin 2017; Casella 2015; May 2020; Reynolds 2014; Shin 2017) with adjusted effect estimates. All five studies found improved outcomes with early coronary angiography with effect estimates ranging from a low of OR 1.43 (95% CI 1.02 to 2.00) to a high of OR 36.36 (95% CI 2.13 to 631.14).

We identified very-low-certainty evidence from 11 observational studies (Bro-Jeppesen 2012; Callaway 2014; Casella 2015; Chelvanathan 2016; Hanuschak 2019; Jentzer 2018; Mooney 2011; Reynolds 2014; Shin 2017; Tomte 2011; Vadeboncoer 2018) with unadjusted effect estimates. All 11 studies found benefit with early coronary angiography with effect estimates ranging from a low of OR 1.83 (95% CI 1.20 to 2.80) to a high of OR 10.54 (95% CI 6.68 to 16.62).

For the critical outcome of survival with *favourable neurologic outcome at 3-6 months* we identified very-low certainty evidence from one observational study (Nielsen 2009) which identified improved outcome with early coronary angiography compared to late/no coronary angiography with a reported unadjusted OR 3.11 (95% CI, 2.40 to 4.04).

Table 4: Studies examining post-ROSC coronary angiography in patients without ST elevation on ECG and any initial rhythm

| Survival          |                      |                      |                    |                       |                      |                      |                    |                      |
|-------------------|----------------------|----------------------|--------------------|-----------------------|----------------------|----------------------|--------------------|----------------------|
|                   | Adjusted             |                      |                    |                       | Unadjusted           |                      |                    |                      |
| Author            | Hospital Discharge   | 30-Day Survival      | 3-6 Month Survival | 1-3 Year Survival     | Hospital Discharge   | 30-Day Survival      | 3-6 Month Survival | 1-3 Year Survival    |
| Aurore 2010       |                      |                      |                    |                       | 2.74<br>(1.57, 4.76) |                      |                    |                      |
| Bergman 2016      |                      |                      |                    |                       | 2.50<br>(1.70, 3.67) |                      |                    | 3.48<br>(2.36, 5.14) |
| Bougouin 2018     | 1.20<br>(0.80, 1.90) |                      |                    |                       | 3.92<br>(2.89, 5.34) |                      |                    |                      |
| Bougouin 2017     |                      |                      |                    |                       |                      |                      |                    |                      |
| Bro-Jeppesen 2012 |                      |                      |                    |                       |                      | 1.61<br>(1.05, 2.47) |                    | 1.84<br>(1.20, 2.81) |
| Callaway 2014     |                      |                      |                    |                       | 4.93<br>(4.17, 5.83) |                      |                    |                      |
| Casella 2015      |                      | 2.38<br>(1.06, 5.26) |                    | 3.57<br>(1.32, 10.00) |                      | 2.59<br>(1.24, 5.43) |                    | 4.51<br>(2.07, 9.87) |
| Chelvanathan 2016 |                      |                      |                    |                       | 3.81<br>(1.96, 7.38) |                      |                    |                      |
| Geri 2015         |                      |                      |                    |                       | 2.40<br>(1.91, 3.02) |                      |                    | 2.88<br>(2.19, 3.79) |
| Hanuschak 2019    |                      |                      |                    |                       | 5.12<br>(4.29, 6.10) |                      |                    |                      |

|                                      |                           |                        |                           |                          |                           |                        |                           |                          |
|--------------------------------------|---------------------------|------------------------|---------------------------|--------------------------|---------------------------|------------------------|---------------------------|--------------------------|
| Jaeger 2018                          |                           | 1.52<br>(1.33, 1.72)   |                           |                          |                           | 2.56<br>(2.32, 2.83)   |                           |                          |
| Jentzer 2018                         |                           |                        |                           |                          | 2.85<br>(2.04, 3.99)      |                        |                           |                          |
| Kern 2015                            |                           |                        |                           |                          | 2.49<br>(1.85, 3.35)      |                        |                           |                          |
| Kroupa 2017                          |                           |                        |                           |                          | 1.20<br>(0.50, 2.90)      |                        |                           |                          |
| Lam 2018                             |                           |                        |                           |                          | 3.00<br>(1.69, 5.28)      |                        |                           |                          |
| Mooney 2011                          |                           |                        |                           |                          | 2.65<br>(1.24, 5.67)      |                        |                           |                          |
| Nadar 2018                           |                           |                        |                           |                          | 2.12<br>(0.69, 6.49)      |                        |                           |                          |
| Nielsen 2009                         |                           |                        |                           |                          | 1.73<br>(1.34, 2.23)      |                        |                           |                          |
| Reynolds 2014                        |                           |                        |                           |                          | 2.26<br>(1.70, 3.01)      |                        |                           |                          |
| Shin 2017                            | 2.70<br>(1.60, 4.60)      |                        |                           |                          | 6.80<br>(4.49, 10.28)     |                        |                           |                          |
| Stub 2011                            | 4.30<br>(0.97, 19.00)     |                        |                           |                          | 7.60<br>(3.20, 17.50)     |                        |                           |                          |
| Vadeboncoer 2018                     |                           |                        |                           |                          | 2.31<br>(1.90, 2.79)      |                        |                           |                          |
| Waldo 2013                           |                           | 2.29<br>(1.19, 4.41)   |                           |                          | 2.46<br>(1.00, 6.04)      |                        |                           |                          |
| Wijesekera 2014                      |                           |                        |                           |                          | 4.41<br>(1.36, 14.32)     |                        |                           |                          |
| Winther-Jensen 2018                  |                           |                        |                           |                          |                           | 1.74<br>(1.11, 2.63)   |                           |                          |
| Zanuttini 2012                       | 2.32<br>(1.23, 4.38)      |                        |                           |                          | 1.74<br>(0.77, 3.97)      |                        |                           |                          |
| <b>Functional Neurologic Outcome</b> |                           |                        |                           |                          |                           |                        |                           |                          |
|                                      | <b>Adjusted</b>           |                        |                           |                          | <b>Unadjusted</b>         |                        |                           |                          |
| <b>Author</b>                        | <b>Hospital Discharge</b> | <b>30-Day Survival</b> | <b>3-6 Month Survival</b> | <b>1-3 Year Survival</b> | <b>Hospital Discharge</b> | <b>30-Day Survival</b> | <b>3-6 Month Survival</b> | <b>1-3 year Survival</b> |



|                   |                        |  |  |  |                        |  |                      |  |
|-------------------|------------------------|--|--|--|------------------------|--|----------------------|--|
| Bougouin 2017     | 1.43<br>(1.02, 2.00)   |  |  |  |                        |  |                      |  |
| Bro-Jeppesen 2012 |                        |  |  |  | 1.83<br>(1.20, 2.80)   |  |                      |  |
| Callaway 2014     |                        |  |  |  | 5.20<br>(4.40, 6.15)   |  |                      |  |
| Casella 2015      | 36.36<br>(2.13, 631.1) |  |  |  | 5.42<br>(2.28, 12.86)  |  |                      |  |
| Chelvanathan 2016 |                        |  |  |  | 9.41<br>(4.19, 21.15)  |  |                      |  |
| Hanuschak 2019    |                        |  |  |  | 5.66<br>(4.74, 6.77)   |  |                      |  |
| Jentzer 2018      |                        |  |  |  | 3.16<br>(2.05, 4.89)   |  |                      |  |
| May 2020          | 1.45<br>(1.02, 2.09)   |  |  |  |                        |  |                      |  |
| Mooney 2011       |                        |  |  |  | 3.29<br>(1.50, 7.24)   |  |                      |  |
| Nielsen 2009      |                        |  |  |  |                        |  | 3.11<br>(2.40, 4.04) |  |
| Reynolds 2014     | 1.92<br>(1.20, 3.07)   |  |  |  | 3.32<br>(2.47, 4.47)   |  |                      |  |
| Shin 2017         | 2.30<br>(1.60, 3.10)   |  |  |  | 10.54<br>(6.68, 16.62) |  |                      |  |
| Tomte 2011        |                        |  |  |  | 2.45<br>(1.04, 5.74)   |  |                      |  |
| Vadeboncoer 2018  |                        |  |  |  | 4.19<br>(3.45, 5.08)   |  |                      |  |

**POST ROSC all ECGs (undifferentiated) initial shockable rhythm**

For the critical outcome of *survival at hospital discharge* we identified very-low certainty evidence from 3 studies (Aissaoui 2018; Bergman 2016; Garcia 2016) reporting adjusted effect estimates comparing early coronary angiography to late/no coronary angiography in comatose post-cardiac arrest patients. Two studies (Aissaoui 2018; Bergman 2016) found benefit with early coronary angiography with effect estimates of OR 7.01 (95% CI 4.80 to 10.23) and OR 2.86 (95% CI 1.43 to 5.56) respectively. A single study (Garcia 2016) found no benefit with an OR 1.60 (95% CI 0.83 to 3.08).

We also identified very-low certainty evidence from 5 studies (Bergman 2016; Cronier 2014; Garcia 2016; Nanjayya 2012; Strote 2012) reporting unadjusted effect estimates. Four studies (Bergman 2016; Cronier 2014; Garcia 2016; Strote 2012) found benefit with early coronary angiography with effect estimates ranging from a low of OR 2.50 (95% CI 1.70 to 3.67) to a high of OR 3.41 (95% CI 1.20 to 9.67). A single study (Nanjayya 2012) found no benefit with an OR 2.03 (95% CI 0.78 to 5.31).

For the critical outcome of *survival at 30-days* we identified very-low certainty evidence from a single study (Jaeger 2018) comparing early coronary angiography to late/no coronary angiography which reported adjusted effect estimates which found improved survival with early coronary angiography [OR 1.74 (95% CI 1.37 to 2.21)].

For the critical outcome of *survival at 1-3 years* we identified very-low certainty evidence from a single study (Bergman 2016) reporting unadjusted effect estimates for early coronary angiography compared to late/no coronary angiography which found improved survival with early coronary angiography [OR 3.48 (95% CI 2.36 to 5.14)].

For the critical outcome of *favourable neurologic outcome at hospital discharge* we identified very-low certainty evidence from 2 studies (Aissaoui 2018; Garcia 2016) which reported adjusted effect estimates for early coronary angiography compared to late/no coronary angiography for comatose post-cardiac arrest patients. Both studies found improved outcome with early coronary angiography with effect estimates of OR 6.40 (95% CI 3.90 to 10.50) and OR 1.99 (95% CI 1.07 to 3.72) respectively.

We also identified very-low certainty evidence from four studies (Garcia 2016; Nanjayya 2012; Strote 2012; Vyas 2015) which reported unadjusted effect estimates for early coronary angiography compared to late/no coronary angiography. Two studies (Strote 2012; Vyas 2015) found improved outcome with early coronary angiography with effect estimates of OR 2.16 (95% CI 1.20 to 3.89) and OR 2.29 (95% CI 2.01 to 2.60) respectively. Two studies (Garcia 2016; Nanjayya 2012) found no benefit with early coronary angiography with effect estimates of OR 1.45 (95% CI 0.54 to 3.89) and OR 1.56 (95% CI 0.94 to 2.56) respectively.

For the critical outcome of *favourable neurologic outcome at 30 days* we identified very-low certainty evidence from a single study (Jaeger 2018) which reported adjusted effect estimates for early coronary angiography compared to late/no coronary angiography for comatose post-cardiac arrest patients which found improved outcome with early coronary angiography [OR 1.57 (95% CI 1.23 to 2.01)].

**Table 5: Studies examining post-ROSC coronary angiography in patients with undifferentiated ECG and initial shockable rhythm**

| Survival      |                      |                 |                    |                   |                      |                 |                    |                      |
|---------------|----------------------|-----------------|--------------------|-------------------|----------------------|-----------------|--------------------|----------------------|
|               | Adjusted             |                 |                    |                   | Unadjusted           |                 |                    |                      |
| Author        | Hospital Discharge   | 30-Day Survival | 3-6 Month Survival | 1-3 Year Survival | Hospital Discharge   | 30-Day Survival | 3-6 Month Survival | 1-3 Year Survival    |
| Aissaoui 2018 | 7.01<br>(4.80,10.23) |                 |                    |                   |                      |                 |                    |                      |
| Bergman 2016  | 2.86<br>(1.43, 5.56) |                 |                    |                   | 2.50<br>(1.70, 3.67) |                 |                    | 3.48<br>(2.36, 5.14) |

|                                      |                           |                        |                           |                          |                           |                        |                           |                          |
|--------------------------------------|---------------------------|------------------------|---------------------------|--------------------------|---------------------------|------------------------|---------------------------|--------------------------|
| Cronier 2014                         |                           |                        |                           |                          | 3.41<br>(1.20, 9.67)      |                        |                           |                          |
| Garcia 2016                          | 1.60<br>(0.83, 3.08)      |                        |                           |                          | 1.31<br>(0.77, 2.27)      |                        |                           |                          |
| Jaeger 2018                          |                           | 1.74<br>(1.37, 2.21)   |                           |                          |                           |                        |                           |                          |
| Nanjayya 2012                        |                           |                        |                           |                          | 2.03<br>(0.78, 5.31)      |                        |                           |                          |
| Strote 2012                          |                           |                        |                           |                          | 2.74<br>(1.46, 5.15)      |                        |                           |                          |
| <b>Favourable Neurologic Outcome</b> |                           |                        |                           |                          |                           |                        |                           |                          |
|                                      | <b>Adjusted</b>           |                        |                           |                          | <b>Unadjusted</b>         |                        |                           |                          |
| <b>Author</b>                        | <b>Hospital Discharge</b> | <b>30-Day Survival</b> | <b>3-6 Month Survival</b> | <b>1-3 Year Survival</b> | <b>Hospital Discharge</b> | <b>30-Day Survival</b> | <b>3-6 Month Survival</b> | <b>1-3 Year Survival</b> |
| Aissaoui 2018                        | 6.40<br>(3.90, 10.50)     |                        |                           |                          |                           |                        |                           |                          |
| Garcia 2016                          | 1.99<br>(1.07, 3.72)      |                        |                           |                          | 1.56<br>(0.94, 2.56)      |                        |                           |                          |
| Jaeger 2018                          |                           | 1.57<br>(1.23, 2.01)   |                           |                          |                           |                        |                           |                          |
| Nanjayya 2012                        |                           |                        |                           |                          | 1.45<br>(0.54, 3.89)      |                        |                           |                          |
| Strote 2012                          |                           |                        |                           |                          | 2.16<br>(1.20, 3.89)      |                        |                           |                          |
| Vyas 2015                            |                           |                        |                           |                          | 2.29<br>(2.01, 2.60)      |                        |                           |                          |

**Appendix C2**  
**Table 1. Characteristics of included studies**

| Author/Year                  | Patient Number | Country               | Study duration | Patient aracteristics                                                                                                                                                                                                                                                                       | Design        | Outcomes                                                                                                                                                                          | STEMI and no STEMI | STEMI | No STEMI | All rhythms | Shockable | Non shockable |
|------------------------------|----------------|-----------------------|----------------|---------------------------------------------------------------------------------------------------------------------------------------------------------------------------------------------------------------------------------------------------------------------------------------------|---------------|-----------------------------------------------------------------------------------------------------------------------------------------------------------------------------------|--------------------|-------|----------|-------------|-----------|---------------|
| <b>RCTS</b>                  |                |                       |                |                                                                                                                                                                                                                                                                                             |               |                                                                                                                                                                                   |                    |       |          |             |           |               |
| Lemkes 2019                  | 552            | Netherlands           | 2015-2018      | Included:<br>OHCA<br>Initial shockable rhythm<br>Unconscious after ROSC<br>Excluded:<br>Signs of STEMI on ECG in the ED<br>Shock<br>Obvious non- coronary cause of the arrest.                                                                                                              | RCT           | Survival at 90 days, Survival to HD, FNO at 90 days, PCI/CABG rates, recurrent VT or VF requiring defibrillation, bleeding, acute renal failure, renal replacement therapy, shock | -                  | -     | +        | -           | +         | -             |
| Elfwen 2019                  | 79             | Sweden                | 2015 - 2017    | Included:<br>Witnessed OHCA; Age> 18 years<br>ROSC; admitted alive to hospital<br>Without ST-segment elevation or new LBBB<br>Excluded:<br>Obvious non-cardiac causes<br>Life expectancy < one year<br>Expected time to CAG >120 min<br>Known pregnancy<br>Patients not unconscious (GCS>8) | RCT           | Survival at 24 h, subarachnoid haemorrhage, recurrent VT/VF, bleeding, bradyarrhythmias needing pacing                                                                            | -                  | -     | +        | +           | -         | -             |
| <b>Observational studies</b> |                |                       |                |                                                                                                                                                                                                                                                                                             |               |                                                                                                                                                                                   |                    |       |          |             |           |               |
| Aissaoui 2018                | 1502           | France, SDEC registry | 2011-2015      | Included:<br>• OHCA<br>• age ≥18 years<br>• initial shockable rhythm<br>• admitted alive to hospital<br>• no obvious extra-cardiac cause<br>• no prior terminal condition                                                                                                                   | Retrospective | Survival to HD, FNO at 1 month                                                                                                                                                    | +                  | -     | -        | -           | +         | -             |
| Aurore 2010                  | 445            | France                | 2000-2006      | Included:<br>• ROSC after OHCA                                                                                                                                                                                                                                                              | Retrospective | Survival to HD                                                                                                                                                                    | +                  | -     | -        | +           | -         | -             |

|                   |      |                                        |             |                                                                                                                                                                                                                                                                                                                                                                                                                                                                                                                                                             |               |                                                                                      |   |   |   |   |   |   |
|-------------------|------|----------------------------------------|-------------|-------------------------------------------------------------------------------------------------------------------------------------------------------------------------------------------------------------------------------------------------------------------------------------------------------------------------------------------------------------------------------------------------------------------------------------------------------------------------------------------------------------------------------------------------------------|---------------|--------------------------------------------------------------------------------------|---|---|---|---|---|---|
| Bergman 2016      | 456  | Netherlands                            | 2003-2010   | Included:<br><ul style="list-style-type: none"> <li>&gt;18 years</li> <li>admitted after OHCA</li> <li>known initial rhythm</li> </ul>                                                                                                                                                                                                                                                                                                                                                                                                                      | Retrospective | Survival to HD 1 and 5 years, FNO at HD                                              | + | - | - | + | + | + |
| Bougouin 2018     | 1817 | France, SDEC registry                  | 2011-2015   | Included:<br><ul style="list-style-type: none"> <li>age ≥ 18 years</li> <li>admitted with ROSC</li> <li>OHCA</li> </ul> Excluded:<br><ul style="list-style-type: none"> <li>prior terminal condition</li> <li>obvious noncardiac cause</li> </ul>                                                                                                                                                                                                                                                                                                           | Retrospective | FNO at HD                                                                            | + | - | - | + | - | - |
| Bougouin 2017     | 1410 | France, PROCAT registry, single centre | 2000-2013   | Included:<br><ul style="list-style-type: none"> <li>OHCA</li> <li>age &gt; 18 years</li> <li>admitted in an ICU with ROSC after CA</li> </ul>                                                                                                                                                                                                                                                                                                                                                                                                               | Retrospective | Survival to HD, FNO at HD                                                            | + | - | - | + | - | - |
| Bro-Jepessen 2012 | 360  | Denmark, Single centre                 | 2004 - 2010 | Included:<br><ul style="list-style-type: none"> <li>≥18 years</li> <li>admitted with sustained ROSC</li> <li>OHCA</li> </ul> Excluded:<br><ul style="list-style-type: none"> <li>GCS ≥9</li> <li>cardiogenic shock upon admission</li> </ul>                                                                                                                                                                                                                                                                                                                | Prospective   | Survival to HD and at 1 year, FNO at HD, Successful PCI                              | + | - | + | + | - | - |
| Callaway 2014     | 3981 | USA, Canada, Multicentre               | 2007-2009   | Included:<br><ul style="list-style-type: none"> <li>age &gt; 18 years</li> <li>OHCA delivered to hospital with a pulse or regained a pulse in the ED</li> <li>survived for &gt;60 min after hospital arrival</li> <li>EMS-witnessed cardiac arrest</li> <li>patients with tracheostomies</li> </ul> Excluded:<br><ul style="list-style-type: none"> <li>prisoners</li> <li>pregnant women</li> <li>patients with "DNR" directives</li> <li>patients with blunt, penetrating or burn-related trauma</li> <li>cardiac arrest due to exsanguination</li> </ul> | Retrospective | Survival to HD, FNO at HD, Stroke/ICH, recurrent arrest, sepsis, pneumonia, bleeding | + | - | - | + | - | - |
| Casella 2015      | 141  | Italy, Single centre                   | 2004 - 2012 | Included:<br><ul style="list-style-type: none"> <li>≥18 years of age</li> <li>no obvious extra-cardiac aetiology</li> <li>admitted alive to hospital after OHCA</li> </ul> Excluded:<br><ul style="list-style-type: none"> <li>GCS ≥9 upon admission</li> <li>terminal illness</li> </ul>                                                                                                                                                                                                                                                                   | Prospective   | Survival at 30 days or at discharge survival at 1 year, FNO at HD, sepsis, bleeding  | + | - | - | + | - | - |

|                   |      |                                                    |             |                                                                                                                                                                               |                          |                                                                                                                  |   |   |   |   |   |   |
|-------------------|------|----------------------------------------------------|-------------|-------------------------------------------------------------------------------------------------------------------------------------------------------------------------------|--------------------------|------------------------------------------------------------------------------------------------------------------|---|---|---|---|---|---|
| Chelvanathan 2016 | 176  | Canada, Single centre                              |             |                                                                                                                                                                               | Retrospective            | Survival to HD, FNO at HD                                                                                        | + | - | - | + | - | - |
| Cronier 2011      | 111  | France, Multicentre                                | 2003-2008   | Included:<br>• Age ≥ 18<br>• ROSC following OHCA<br>• shockable rhythm                                                                                                        | Prospective              | Survival to HD                                                                                                   | + | - | - | - | + | - |
| Dankiewicz 2015   | 544  | Multiple Countries; Europe, Australia, Multicentre | 2010 - 2013 | Included:<br>• OHCA of presumed cardiac cause<br>• no STEMI                                                                                                                   | Post-hoc analysis of RCT | Survival at the end of the study, FNO at 6 months, complications, Successful PCI, bleeding                       | - | - | + | + | - | - |
| Elfwen 2018       | 799  | Sweden, Different national registers, multicentre  | 2008 - 2013 | Included:<br>• bystander-witnessed OHCA<br>• age > 18 years<br>• shockable first rhythm<br>• admitted alive to hospital<br>Excluded:<br>• GCS > 8<br>• age > 80 years         | Retrospective            | Survival at 30 days and at 1 and 3 years                                                                         | - | - | + | - | + | - |
| Garcia 2016       | 315  | USA, CARES registry                                | 2013-2014   | Included:<br>• Prehospital CA<br>• age > 18 and < 76 years<br>• arrest of presumed cardiac etiology                                                                           | Retrospective            | Survival to HD, FNO at HD                                                                                        | + | + | + | - | + | - |
| Geri 2015         | 1722 | France, Multicentre                                | 2000-2013   | Included:<br>• Nontraumatic OHCA                                                                                                                                              | Retrospective            | Survival to 30 days, Survival to a median follow up 3.2 years                                                    | + | - | - | + | - | - |
| Hanuschak 2019    | 2578 | Canada, Multicentre                                | 2010-2014   | Included:<br>• age > 17 years<br>• treated by EMS<br>• OHCA<br>• alive six hours following ED arrival<br>Excluded:<br>• pre-existing DNR order<br>• obvious non-cardiac issue | Retrospective            | Survival to HD, FNO at HD                                                                                        | + | + | + | + | - | - |
| Hollenbeck 2014   | 269  | USA, INTCAR registry                               | 2005-2011   | Included:<br>• age ≥ 18 years<br>• survived to hospitalization<br>• comatose state<br>• cardiac arrest due to VT or VF<br>Excluded:<br>• patients with ECG criteria for STEMI | Retrospective            | Survival to HD, Survival to a mean follow up 5.7 to 6 months; FNO at HD, FNO to a mean follow up 5.7 to 6 months | - | - | + | - | + | - |

|               |      |                               |             |                                                                                                                                                                                                                                                                                                       |               |                                                                         |   |   |   |   |   |   |
|---------------|------|-------------------------------|-------------|-------------------------------------------------------------------------------------------------------------------------------------------------------------------------------------------------------------------------------------------------------------------------------------------------------|---------------|-------------------------------------------------------------------------|---|---|---|---|---|---|
| Jaeger 2018   | 4046 | France, REAC registry         | 2011-2016   | Included:<br><ul style="list-style-type: none"> <li>age &gt;18 years</li> <li>cardiac cause</li> <li>transported to the hospital</li> </ul>                                                                                                                                                           | Retrospective | Survival at 30 days, FNO at 30 days                                     | + | - | - | + | + | + |
| Jentzer 2018  | 599  | USA, Multicentre              | 2005-2013   | Included:<br><ul style="list-style-type: none"> <li>OHCA of presumed cardiac etiology</li> </ul> Excluded:<br><ul style="list-style-type: none"> <li>Subjects who died or failed to achieve ROSC in the ED</li> <li>patients receiving ongoing resuscitation at the time of CAG</li> </ul>            | Prospective   | Survival to HD, FNO at HD, complications, Successful PCI, bleeding      | + | - | - | - | - | - |
| Kern 2015     | 745  | USA, INTCAR registry          | 2006-2011   | Included:<br><ul style="list-style-type: none"> <li>patients ≥18 years</li> <li>survived to hospitalization in a comatose state after cardiac arrest</li> </ul>                                                                                                                                       | Retrospective | Survival to HD, FNO at 6.5 ±4.5 months                                  | + | + | + | + | - | - |
| Kim 2019      | 227  | Korea, Multicentre            | 2010-2015   | Included:<br><ul style="list-style-type: none"> <li>adult (&gt;18 years)</li> <li>non-traumatic OHCA survivors</li> <li>treated with TTM</li> </ul>                                                                                                                                                   | Retrospective | Survival at 30 days, FNO at 30 days                                     | - | - | + | + | - | - |
| Kleisner 2015 | 99   | Czech Republic, Single centre | 2007-2014   | Included:<br><ul style="list-style-type: none"> <li>OHCA survivors who were admitted to ICU</li> </ul> Excluded:<br><ul style="list-style-type: none"> <li>Patients with acute STEMI or myocardial infarction with left bundle branch block</li> </ul>                                                | Prospective   | Survival at discharge and at 6 months, FNO at discharge and at 6 months | - | - | + | + | - | - |
| Kroupa 2017   | 102  | Czech Republic, Single centre | 2011 - 2013 | Included:<br><ul style="list-style-type: none"> <li>age&gt;18 years</li> <li>OHCA</li> <li>admitted to the CCU</li> </ul>                                                                                                                                                                             | Retrospective | Survival to HD, Survival at 1 year                                      | + | - | - | + | - | - |
| Lam 2018      | 323  | USA, Single centre            | 2007-2014   | Included:<br><ul style="list-style-type: none"> <li>patients with OHCA</li> <li>who achieved ROSC</li> <li>admitted to hospital</li> </ul> Excluded:<br><ul style="list-style-type: none"> <li>angiography at an acute care hospital prior to transfer</li> <li>incomplete medical records</li> </ul> | Retrospective | Survival to HD                                                          | + | - | - | + | - | - |
| May 2020      | 966  | USA, Multicentre              | 2006 - 2017 | Included:<br><ul style="list-style-type: none"> <li>Unconscious patients (GCS &lt;6)</li> <li>age≥18 years</li> <li>admitted to the intensive care unit</li> <li>ROSC after OHCA</li> <li>presumed cardiac etiology</li> </ul>                                                                        | Retrospective | Survival to HD FNO at HD and at 6 months                                | + | - | - | + | - | - |

|               |      |                             |             |                                                                                                                                                                                                                                                                                                                                                                                                   |               |                                                                        |   |   |   |   |   |   |
|---------------|------|-----------------------------|-------------|---------------------------------------------------------------------------------------------------------------------------------------------------------------------------------------------------------------------------------------------------------------------------------------------------------------------------------------------------------------------------------------------------|---------------|------------------------------------------------------------------------|---|---|---|---|---|---|
| Mooney 2011   | 140  | USA, Single centre          | 2006-2009   | <p>Included:</p> <ul style="list-style-type: none"> <li>• OHCA</li> <li>• unresponsive after ROSC</li> <li>• collapse to ROSC &lt;60 minutes</li> </ul> <p>Excluded:</p> <ul style="list-style-type: none"> <li>• comatose before arrest</li> <li>• active bleeding</li> <li>• do-not-resuscitate directives</li> </ul>                                                                           | Prospective   | Survival to HD, FNO at 6.5 ±4.5 months                                 | + | - | - | + | - | - |
| Nadar 2018    | 216  | Oman, Single centre         | 2012 - 2016 | <p>Included:</p> <ul style="list-style-type: none"> <li>• individuals &gt; 18 years</li> <li>• OHCA</li> </ul> <p>Excluded:</p> <ul style="list-style-type: none"> <li>• clear non cardiac cause of CA</li> <li>• dead on arrival to hospital</li> <li>• chronicle terminal illness</li> </ul>                                                                                                    | Retrospective | Survival to HD                                                         | + | - | - | + | - | - |
| Nanjayya 2012 | 70   | Australia, Single centre    | 2003 - 2008 | <p>Included:</p> <ul style="list-style-type: none"> <li>• age ≥18 years</li> <li>• successful ROSC</li> <li>• VF/pVT OHCA</li> <li>• admitted to ICU</li> </ul>                                                                                                                                                                                                                                   | Retrospective | Survival to HD, FNO at HD                                              | + | - | - | - | + | - |
| Nielsen 2009  | 986  | USA, Europe, Multicentre    | 2004-2008   | <p>Included:</p> <ul style="list-style-type: none"> <li>• ROSC after CA</li> <li>• treated in ICU</li> <li>• GCS&lt;8</li> </ul>                                                                                                                                                                                                                                                                  | Prospective   | Survival to HD, Survival at 6-12 months, FNO to hD, FNO at 6-12 months | + | - | - | + | - | - |
| Plescot 2008  | 26   | Czech Republic, Multicentre | 2002-2004   | <p>Included:</p> <ul style="list-style-type: none"> <li>• ROSC</li> <li>• OHCA</li> <li>• admitted to hospital</li> </ul> <p>Excluded:</p> <ul style="list-style-type: none"> <li>• cardiac arrest in the presence of EMS</li> <li>• terminal illness</li> <li>• non-cardiac etiology of CA</li> </ul>                                                                                            | Prospective   | Survival to HD and at 1 year, FNO at HD and at 1 year                  | - | + | - | + | - | - |
| Reynolds 2014 | 1011 | USA, Single centre          | 2005-2012   | <p>Included:</p> <ul style="list-style-type: none"> <li>• ≥ 18 years</li> <li>• ROSC</li> <li>• OHCA, IHCA</li> </ul> <p>Excluded:</p> <ul style="list-style-type: none"> <li>• traumatic or surgical causes of arrest</li> <li>• immediate re-arrest and failure to resuscitate</li> <li>• withdrawal of care within 6 h of return of pulses because of advanced directives or wishes</li> </ul> | Retrospective | Survival to HD, FNO to HD                                              | + | - | - | + | - | - |



|                  |      |                          |                               |                                                                                                                                                                                                                                                                                                                                                                                                                           |               |                           |   |   |   |   |   |   |
|------------------|------|--------------------------|-------------------------------|---------------------------------------------------------------------------------------------------------------------------------------------------------------------------------------------------------------------------------------------------------------------------------------------------------------------------------------------------------------------------------------------------------------------------|---------------|---------------------------|---|---|---|---|---|---|
| Shin 2017        | 607  | Korea, Captures registry | 2014-2014                     | <p>Included:</p> <ul style="list-style-type: none"> <li>• OHCA</li> <li>• without a definite non-cardiac cause of arrest</li> </ul> <p>Excluded:</p> <ul style="list-style-type: none"> <li>• no ROSC</li> <li>• age &lt;18 years</li> <li>• not transferred by EMS</li> <li>• incomplete data</li> </ul>                                                                                                                 | Prospective   | Survival to HD, FNO to HD | + | - | - | + | - | - |
| Strote 2012      | 240  | USA, Multicentre         | 1999 - 2002                   | <p>Included:</p> <ul style="list-style-type: none"> <li>• ROSC from OHCA</li> <li>• VF or VT as the first identified rhythm</li> </ul>                                                                                                                                                                                                                                                                                    | Retrospective | Survival to HD, FNO to HD | + | - | - | - | + | - |
| Stub 2011        | 125  | Australia, Single centre | 2002-2003 (control) 2007-2009 | <p>Included:</p> <ul style="list-style-type: none"> <li>• OHCA</li> <li>• VF</li> <li>• sustained ROSC &gt;20 min</li> <li>• admitted to hospital</li> </ul>                                                                                                                                                                                                                                                              | Retrospective | Survival to HD            | + | - | - | + | - | - |
| Tomte 2011       | 174  | Norway, Multicentre      | 2003 - 2009                   | <p>Included:</p> <ul style="list-style-type: none"> <li>• OHCA</li> <li>• presumed cardiac origin</li> <li>• surviving to ICU admission</li> </ul> <p>Excluded:</p> <ul style="list-style-type: none"> <li>• initially treated at other hospitals</li> </ul>                                                                                                                                                              | Prospective   | FNO to HD                 | + | - | - | + | - | - |
| Vadenbocoer 2018 | 1881 | USA, CARES registry      | 2010-2014                     | <p>Included:</p> <ul style="list-style-type: none"> <li>• age ≥18 years</li> <li>• OHCA</li> <li>• transported initially or transferred to a Cardiac Receiving Centre</li> </ul> <p>Excluded:</p> <ul style="list-style-type: none"> <li>• prehospital resuscitation not initiated</li> <li>• cause of CA presumed to be non-cardiac</li> <li>• patient with a DNR order</li> <li>• the patient died in the ED</li> </ul> | Prospective   | Survival to HD, FNO to HD | + | - | + | + | - | - |

|                |      |                           |           |                                                                                                                                                                                                                                                                                                                                                                                                                                                                                                                                                         |               |                                               |   |   |   |   |   |   |
|----------------|------|---------------------------|-----------|---------------------------------------------------------------------------------------------------------------------------------------------------------------------------------------------------------------------------------------------------------------------------------------------------------------------------------------------------------------------------------------------------------------------------------------------------------------------------------------------------------------------------------------------------------|---------------|-----------------------------------------------|---|---|---|---|---|---|
| Vyas 2015      | 4029 | USA, CARES registry       | 2010-2013 | <p>Included:</p> <ul style="list-style-type: none"> <li>• age ≥18 years</li> <li>• OHCA</li> <li>• VF/ VT or unknown shockable rhythm</li> <li>• sustained ROSC ≥20 min</li> <li>• admission to hospital</li> </ul> <p>Excluded:</p> <ul style="list-style-type: none"> <li>• patients with no report data on performance of CAG</li> <li>• hospitals that did not perform CAG on any cardiac arrest patient and were also confirmed to not have a cardiac catheterization laboratory</li> <li>• missing data on the date of CAG or survival</li> </ul> | Retrospective | Survival to HD, FNO to HD                     | + | - | - | - | + | - |
| Waldo 2013     | 110  | USA, ACTIVATE SF registry | 2008-2012 | <p>Included:</p> <ul style="list-style-type: none"> <li>• cardiac arrest successfully resuscitated.</li> </ul>                                                                                                                                                                                                                                                                                                                                                                                                                                          | Retrospective | Survival to hospital discharge and at 30 days | + | - | - | + | - | - |
| Weiser 2013    | 249  | Austria, Single centre    | 2005-2010 | <p>Included:</p> <ul style="list-style-type: none"> <li>• Survivors of OHCA</li> <li>• cardiac aetiology with good neurological performance</li> <li>• age ≥18 years</li> <li>• ST-segment elevation in their first ECG after sustained ROSC</li> </ul>                                                                                                                                                                                                                                                                                                 | Prospective   | Survival at 30 days, FNO at 30 days           | - | + | - | + | - | - |
| Wijsekera 2014 | 78   | Australia, Single centre  | 2007-2009 | <p>Included:</p> <ul style="list-style-type: none"> <li>• OHCA</li> <li>• age ≥18 years</li> <li>• admitted to either the coronary or the intensive care unit</li> </ul>                                                                                                                                                                                                                                                                                                                                                                                | Retrospective | Survival to HD, FNO to HD                     | + | - | - | + | - | - |
| Winther Jensen | 704  | Denmark, Multiple centre  | 2007-2011 | <p>Included:</p> <ul style="list-style-type: none"> <li>• age ≥18 years</li> <li>• OHCA</li> <li>• presumed cardiac aetiology</li> <li>• successful resuscitation or ongoing CPR at hospital arrival</li> <li>• dispatch by the physician-based EMS</li> </ul>                                                                                                                                                                                                                                                                                          | Retrospective | Survival at 30 days                           | + | - | - | + | - | - |

|                   |    |                         |                |                                                                                                                                                                                                                                                            |               |                |   |   |   |   |   |   |
|-------------------|----|-------------------------|----------------|------------------------------------------------------------------------------------------------------------------------------------------------------------------------------------------------------------------------------------------------------------|---------------|----------------|---|---|---|---|---|---|
| Zanuttini<br>2012 | 93 | Italy, Single<br>centre | 2008 -<br>2011 | Included: <ul style="list-style-type: none"> <li>• OHCA</li> <li>• age &gt;18 years</li> <li>• sustained ROSC (≥120 minutes)</li> <li>• persistent unconscious state at hospital admission</li> <li>• absence of any obvious extracardiac cause</li> </ul> | Retrospective | Survival to HD | + | - | - | + | - | - |
|-------------------|----|-------------------------|----------------|------------------------------------------------------------------------------------------------------------------------------------------------------------------------------------------------------------------------------------------------------------|---------------|----------------|---|---|---|---|---|---|

HD: hospital Discharge, FNO: Favorable Neurologic Outcome, ROSC: Return of Spontaneous Circulation, OHCA: Out of Hospital Cardiac Arrest, GCS: Glasgow Coma Scale, ED: Emergency Department, DNR : Do Not Resuscitate, ICH: intracranial haemorrhage, SPARC: Post Arrest Resuscitation Care , EMS: emergency medical services, CAG: coronary angiography

## Appendix C3

## Cryotherapy for Epistaxis: Experimental Study Characteristics and Findings

| Author, year, country        | Study design           | Population                                                                                                                                               | Intervention                                                                                                                                         | Control                                           | Outcome                                                                                                    | Findings on our outcomes, as presented in article.                                                                                                                                                                                                                                                                                                                                                                                                      |
|------------------------------|------------------------|----------------------------------------------------------------------------------------------------------------------------------------------------------|------------------------------------------------------------------------------------------------------------------------------------------------------|---------------------------------------------------|------------------------------------------------------------------------------------------------------------|---------------------------------------------------------------------------------------------------------------------------------------------------------------------------------------------------------------------------------------------------------------------------------------------------------------------------------------------------------------------------------------------------------------------------------------------------------|
| Ozturk, 2014, Turkey         | Observation            | 15 patients (mean age=28.8; 9 female) least 18 years with no nasal symptoms within 3 weeks, and not pregnant.                                            | Nasal dorsal skin cooling using two ice applied to left (L) and right (R) side of nose for 10 minutes (n=15).                                        | No application, baseline                          | Cross-sectional area (cm <sup>2</sup> ) and nasal cavity volume (cm <sup>3</sup> ) via acoustic rhinometry | <p>* Mean values for sum of the L and R first minimal cross-sectional area and second minimal cross-sectional area revealed no statistical differences, for either parameter at any between any intervals.</p> <p>* Means values for nasal cavity volume revealed no statistical differences, for any parameter, between any intervals.</p>                                                                                                             |
| Porter, 1991, United Kingdom | Cross-over, Randomized | 16 healthy subjects (mean age=32, range 25-40) with no history of nasal disease, previous nasal surgery or symptoms and a normal rheoscopic examination. | Ice contained with a surgical glove applied to forehead or mouth for 3 minutes each (n=16).                                                          | Same, but at body temperature for 3 minutes each. | Nasal mucosal blood flow, measured in flux (velocity and concentration of the moving blood cells)          | <p>* Oral ice packs produced a significant decrease in nasal mucosal blood flow (p&lt;0.05, average decrease=23% [standard error=5.9]) compared to control (average decrease=5%; standard error not calculated).</p> <p>* Oral ice packs produced a fall in flux in 9 of 16 (56%) subjects, a rise in 1 (6%), and 6 (37%) experienced no change.</p> <p>* Ice packs to forehead produced a fall in flux in 1 of 16 (6%) subjects, a rise in 1 (6%).</p> |
| Porter, 1991b United Kingdom | Cross-over, Randomized | 13 healthy subjects (mean age=30, range 25-40) with no nasal disease or treatment.                                                                       | <p>a. Ice pack wrapped in paper toweling held to the forehead by subject for 15 minutes.</p> <p>b. Ice cubes sucked in the mouth for 15 minutes.</p> | No application, baseline                          | Nasal submucosal temperature (°C)                                                                          | <p>* A significant difference between the nasal submucosal temperature ice pack to forehead (a) compared to ice cubs in mouth (b) (p=.0.026), favoring ice cubes alone.</p> <p>* A significant difference between nasal submucosal temperature in ice pack to forehead compared to combined stimulus (c) (p=.0.006), favoring combined stimulus.</p>                                                                                                    |

|                            |            |                                                                                                                                                                                               |                                                                                                                                                |                          |                                                                                                                                                                                                                                        |                                                                                                                                                                                                                                                                                                                                                                                                                                                                                                                             |
|----------------------------|------------|-----------------------------------------------------------------------------------------------------------------------------------------------------------------------------------------------|------------------------------------------------------------------------------------------------------------------------------------------------|--------------------------|----------------------------------------------------------------------------------------------------------------------------------------------------------------------------------------------------------------------------------------|-----------------------------------------------------------------------------------------------------------------------------------------------------------------------------------------------------------------------------------------------------------------------------------------------------------------------------------------------------------------------------------------------------------------------------------------------------------------------------------------------------------------------------|
|                            |            |                                                                                                                                                                                               | c. combination of (a) and (b) for 15 minutes.                                                                                                  |                          |                                                                                                                                                                                                                                        | *In all subjects (n=13, 100%) ice cubes in mouth (b) produced a lower nasal submucosal temperature. The ice pack to the forehead (a) produced a decrease in nasal mucosal temperature in 7 of 13 (53%) subjects.                                                                                                                                                                                                                                                                                                            |
| Scheibe, 2006, Germany     | Cross-over | 15 healthy subjects (range 25-40, 7 female) with no reported breathing difficulties, acute nasal allergies, or an acute rhinitis; nasal endoscopy by an ENT specialist revealed no pathology. | Ice collar (4°C) placed onto neck region for 10 minutes.                                                                                       | No application, baseline | Nasal blood volume via optical rhinometry (measured in nm) for whole nose and at septum, randomized.                                                                                                                                   | *A significant (p<0.01) decrease in blood volume could be seen for regional measurements at the septum.<br><br>* Decrease in nasal blood volume at the nasal septum was, on average, observed after approximately 2 minutes (t <sub>1</sub> =111 sec ± 73 sec); decrease reached its maximum after approximately 6 minutes (t <sub>2</sub> =337 sec ± 119 sec).                                                                                                                                                             |
| Teymoortash, 2003, Germany | Cross-over | 56 healthy subjects (mean age=30, range 17-48) with normal rhinoscopy and no history of nasal allergy or acute or recurrent symptoms of rhinitis.                                             | Ice pack applied all-around the neck for 5 minutes.                                                                                            | No application, baseline | Nasal mucosal microcirculatory blood flow via laser Doppler flowmetry, nasal mucosal blood content (indirectly via conventional computer-aided anterior rhinomanometer by measuring alternations in nasal airflow and airway patency). | * After cold application, nasal mucosal blood flow decreased from 1368.8 ± 927.9 to 1130.5 ± 792.2). Difference between before and after cold application was not significant (P=0.11).<br><br>* Total nasal inspiratory airflow before application was 513.9±190.4cm <sup>3</sup> /s, and after exposure to cold 471.5±164.6 cm <sup>3</sup> /s (P=0.08).<br><br>* Total nasal expiratory airflow before application was 474.2±211.7 cm <sup>3</sup> /s and after exposure to cold 443.1±162.4 cm <sup>3</sup> /s (P=0.30) |
| Yamagiwa, 1990, Denmark    | Cross-over | 10 healthy subjects (mean age=21±11.0, range 24-54) with no significant complaints or rhinoscopically overt nasal abnormalities.                                                              | Feet cooling (both) in large tub (0-4°C) immersed 30 cm from heel for 5 minutes, (n=10).<br><br>One hand and forearm cooling in bucket (0-4°C) | No application, baseline | Nasal cavity volume (mL) rhinometry for L and R cavities.                                                                                                                                                                              | * Foot cooling arm. In the exposure period, nasal airway volume was significantly higher than preexposure values in 4 of 10 (40%) of subjects, none showed significantly lower values.<br><br>* Hand cooling arm. In the exposure period, nasal airway volume was significantly higher than preexposure values in 1 of 9 (11%) of subjects, lower in                                                                                                                                                                        |

immersed to around 23  
cm from the middle  
fingertip for 5 minutes  
(n=9).

2 of 9 (22%), and no difference in 6 of 9  
(66%)

## Appendix C4

## Cryotherapy for Epistaxis: Gray literature study characteristics and findings

| Author, year, country                            | Study design, setting/audience                           | Intervention Concepts                                      | Cryotherapy Statements                                                                                                                                                                                                              | Direct Pressure Application Time |
|--------------------------------------------------|----------------------------------------------------------|------------------------------------------------------------|-------------------------------------------------------------------------------------------------------------------------------------------------------------------------------------------------------------------------------------|----------------------------------|
| Pope, 2005, UK<br>{Pope 2005 309}                | Narrative:<br>Clinical practice                          | Direct pressure<br><br>Patient position<br><br>Cryotherapy | "...improved by a cold compress or the patient sucking on ice." p.310                                                                                                                                                               | NA                               |
| Wong, 2018, Australia<br>{Wong 2018 E13}         | Narrative:<br>Family practice                            | Direct pressure<br><br>Patient position<br><br>Cryotherapy | "Applying ice packs around the neck and having the patient suck on ice significantly reduces nasal mucosa blood flow and can slow down the bleeding.7" p.E16                                                                        | 10 min                           |
| Record, 2015, United States<br>{Record 2015 484} | Practice guideline:<br>Nursing                           | Direct pressure<br><br>Patient position<br><br>Cryotherapy | "Ice compresses to the forehead or neck may be used, but studies are inconclusive as to the usefulness of this maneuver (Teymoortash 2003; Scheibe, 2006)." p.487                                                                   | 10 min                           |
| Upile, 2008, United Kingdom<br>{Upile 2008 1349} | Protocol:<br>United Kingdom Healthcare System, first aid | Direct pressure<br><br>Cryotherapy                         | "...pinching the whole of the cartilaginous tip of the nose for 30 min followed by another 30 min of pressure and pack of ice on bridge of nose if bleeding continued."                                                             | 30 min + 30 min                  |
| O'Sullivan, 2020, Ireland<br>{O'Sullivan 2020}   | Informational:<br>Website                                | Direct pressure<br><br>Cryotherapy                         | "...putting an ice pack on to their forehead."                                                                                                                                                                                      | 20 min                           |
| Beck, 2018, German<br>{Beck 2018 12}             | Review:<br>primary and secondary care                    | Direct pressure<br><br>Patient position<br><br>Cryotherapy | "Local application of ice, e.g., at the back of the neck, is intended to encourage vasoconstriction of the blood vessels of the nose." Its therapeutic value is a matter of debate and has been challenged in the literature (38)." | 15-20                            |
